# **Title: In praise of fossil fuel subsidies (for cooking) ‡**

**Authors:** Carlos F. Gould <sup>1\*</sup>, Rob Bailis <sup>2</sup>, Kalpana Balakrishnan <sup>3</sup>, Marshall Burke <sup>4,5,6</sup>, Sebastián Espinoza <sup>7</sup>, Sumi Mehta <sup>8</sup>, Samuel B. Schlesinger <sup>9</sup>, José R. Suarez-Lopez <sup>1</sup>, Ajay Pillarisetti <sup>10</sup>

## **Affiliations:**

<sup>1</sup>Herbert Wertheim School of Public Health and Longevity Science, University of California, San Diego; San Diego, USA

<sup>2</sup>Stockholm Environment Institute; Somerville, USA

<sup>3</sup>Department of Environmental Health Engineering, Faculty of Public Health, Sri Ramachandra Institute of Higher Education and Research; Chennai, India

<sup>4</sup>Doerr School of Sustainability, Stanford University; Stanford, USA

<sup>5</sup>Center for Food, Security, and Environment, Stanford University; Stanford, USA

<sup>6</sup>National Bureau of Economic Research; Cambridge, USA

<sup>7</sup>Instituto de Investigación Geológico y Energético; Quito, Ecuador

<sup>8</sup>Vital Strategies; New York, USA

<sup>9</sup>Independent Consultant; Quito, Ecuador

<sup>10</sup>School of Public Health, University of California, Berkeley; Berkeley, USA

\*Corresponding author. Email: [cagould@health.ucsd.edu](mailto:cagould@health.ucsd.edu)

**One-Sentence Summary:** Condemnation of cooking gas subsidies lacks broader perspective, as such subsidies enable cleaner cooking and can deliver health and climate benefits.

---

‡ Our title draws inspiration from Kirk R. Smith (2002) ‘In praise of petroleum?’ *Science* and Kirk R. Smith (2014) ‘In praise of power’ *Science*.

## Abstract:

We use three quantitative case studies to argue that ubiquitous and universal condemnation of fossil fuel subsidies is myopic and does not adequately consider subsidizing gas for cooking as a potential strategy to improve public health and reduce greenhouse gas emissions. Ecuador offers a view into the long-run impacts of gas subsidies, having made historical investments in subsidizing gas for cooking that led to widespread use that outpaces peer nations. We calculate that the subsidy likely averted 100,000 premature deaths with benefits that outweigh costs four to one. India successfully implemented the largest gas cooking access program in the world, but the level of subsidies provided by the government has varied. We estimate that mortality and climate benefits from maintaining varying levels of the gas subsidy between 2023-2030 will be roughly double costs. In Kenya, removing a value added tax on LPG will yield health and climate benefits that will dwarf the lost revenue by ~30x. Waiting for existing policies and momentum to move households toward near-exclusive clean fuel use forces marginalized populations to directly face the health, environmental, and socio-economic harms of traditional cooking. Rather than wait decades for development to provide clean cooking to these households, which will deepen health and energy inequities, we suggest that targeted LPG subsidies offer a solution available today and provide immediate health and climate benefits.

# **Main text:**

Fossil fuel subsidies are broadly condemned as economically and environmentally detrimental. We argue that, for the case of subsidizing fossil fuels for cooking, this condemnation is myopic and can deepen health and energy inequities. Subsidizing gas for cooking can help more than 400 million poor, marginalized, and vulnerable households avoid the large health and climate costs associated with traditional biomass cooking.

Economists contend that subsidies, especially for fossil fuels, are an inefficient allocation of resources that generate large fiscal burdens, are disproportionately captured by the wealthy, and that crowd out better policy and financial alternatives (1, 2). We agree. Fossil fuels harm the climate. They account for 75% of global greenhouse gas emissions (3). Fossil fuels also harm human health. They are responsible for millions of premature deaths yearly from ambient air pollution (4).

Of course, fossil fuels have powered modern life since for well over a century. However, in the past decade, the scale up of reliable, low-cost, and clean renewable energy demonstrates that such sources can facilitate continued economic growth while reducing the harms that fossil fuels cause to planetary and human health. With that said, this future is a long way off for much of the world. Under current policy commitments, 30% of the global population will lack access to modern cooking fuels (gas and electricity) by 2030 (5). Waiting for existing policies or the free market to close these gaps forces marginalized populations to continue traditional, inefficient cooking practices.

Today, biomass (firewood, dung, crop residues, charcoal) combustion in traditional stoves for cooking and heating emits pollution that is responsible for 4% of all premature deaths and 2% of global carbon dioxide equivalent (CO<sub>2</sub>e) emissions (6, 7). Not surprisingly, this

burden falls disproportionately on the least wealthy and most marginalized. For these communities, it will likely be decades before reliable electricity can provide energy for cooking.

Arguably, the most viable solution available today, and in the near-term, for reducing the harms of traditional biomass combustion is liquified petroleum gas (LPG), a blend of propane and butane stored in easily transported and stable cylinders. As compared to using biomass, those that cook with gas experience much lower air pollution exposures (8, 9). Cooking with gas also produces fewer greenhouse gas emissions than biomass cooking when accounting for unsustainable wood harvesting (10). However, biomass-reliant households are often too poor to afford near-exclusive LPG use (11), which is what is needed to substantially reduce air pollution exposures and improve health. Despite LPG's potential as an immediate solution to address the harms of household air pollution in many regions, the prospect of making cooking gas affordable through sustained subsidy mechanisms, even as a transitional fuel, is not widely considered a viable policy choice.

Gas subsidies can address multiple market failures that limit LPG adoption and use. Subsidies can alleviate financial constraints faced by biomass-dependent households resulting from low incomes or restricted access to credit. LPG subsidies also can reduce the myriad external costs of biomass combustion, including higher greenhouse gas emissions, adverse health outcomes, landscape degradation, and increased household and ambient air pollution. Information campaigns to promote the benefits of cleaner cooking, which could avoid or reduce subsidy deployment, have not been successful in increasing gas consumption. It is increasingly clear that costs are the primary barrier to widespread and near-exclusive LPG use (11, 12).

We draw on three country case studies in Ecuador, India, and Kenya to discuss the promises and pitfalls of gas cooking subsidies. First, Ecuador offers a view into the long-run impacts of LPG subsidies. Ecuador made historical investments in LPG subsidies for cooking

that led to widespread use that outpaces nations at similar income levels. Our analysis indicates that the subsidy has likely averted tens of thousands of premature deaths and that it passes a basic benefits-costs analysis, yet it has become a contentious political issue. Second, India has successfully implemented the largest LPG access program in the world, though the level of subsidy provided by the government has been variable in recent years, impacting use rates. Third, Kenya's fluctuating stance on a value added tax (VAT) on LPG between 2016 and 2021 underscores the tightrope walked by numerous sub-Saharan African nations that grapple with the dual challenge of promoting clean cooking and managing fiscal pressures intensified by the COVID-19 pandemic. For each of these three cases, we quantify the health and climate benefits accrued by reduced reliance on cooking with biomass fuels in the presence of affordable, subsidized LPG.

### **Development and impact of long-standing gas subsidies in Ecuador**

In the 1970s, Ecuador's petroleum boom spurred government spending on welfare-enhancing programs to generate political support, including a universal subsidy for residential LPG that began in 1979. Per capita LPG consumption grew by an average of 31% annually in the 1970s, by 12% in the 1980s, and by 4% from 1990–2010. From 1979–2019, the LPG subsidy cost the government \$13.3 billion (0.8% of GDP and 2-5% of government spending) (Table 1).

To model averted deaths from increased LPG adoption for cooking since 1979, we combine nationwide mortality rates, population counts, the fraction of households using a clean-burning fuel for cooking, personal fine particulate matter (PM<sub>2.5</sub>) exposures for cooking with firewood versus gas, and existing PM<sub>2.5</sub> exposure-mortality relationships (13) (see SM).

We compare observed LPG scale-up to a counterfactual scenario where Ecuador's transition is slowed by 20 years, mirroring adoption in neighboring Peru.

We calculate that 98,000 premature deaths (bootstrapped 95% CI: 47,300 to 147,000) were averted between 1979–2019 because of subsidy-induced accelerated LPG uptake. This estimate agrees with similar modeling from the Global Burden of Disease and with regression evidence that relates yearly mortality rates with cooking fuel use from 1990—2019 at the canton level (see SM). To quantify program impacts on CO<sub>2e</sub>, we apply standard estimates of energy demand and fuel emissions (see SM); we estimate that actual LPG scale-up avoided 52 kilotonnes CO<sub>2e</sub> from 1979–2019, equivalent to 22% fewer cooking-related emissions in the country. Monetizing mortality and climate changes indicates that benefits from the LPG subsidy outweigh costs by a factor of four (Table 1).

### **Benefits from maintaining the world's largest LPG subsidy in India**

Since 2015, India has been undergoing a rapid clean cooking fuel transition, with a focus on improving LPG access among poor households. Remarkably, more than 500 million Indians live in a home that recently acquired an LPG stove via the large-scale government program Pradhan Mantri Ujjwala Yojana (PMUY). Despite this progress, between 2019-2021, an estimated two-fifths of Indian households still cooked primarily with biomass.

While PMUY has been rightly heralded as a success, access alone is not enough: sustained, near-exclusive use is necessary to maximize health and climate benefits. For LPG to be used regularly, it must be affordable. Historically, PMUY beneficiaries purchased cylinder refills at market rates. Subsidies, which can defray up to 45% of the market cost, are subsequently deposited into customers' bank accounts. However, the Government of India almost entirely cut the 2023-2024 budget allocated to subsidizing LPG (14), dimming hopes for

a more complete transition to clean fuels; as of July 2023, a fraction of subsidies for LPG consumers were restored.

To estimate the benefits of different levels of the LPG subsidy for PMUY beneficiaries, we consider three scenarios for the cost to consumers of an LPG cylinder refill – the 2019 subsidized cost (550 INR), the current subsidized cost (700 INR), and a more modest cost of 900 INR – each of which we compare to current market cylinder refill costs (1100 INR). We generate a density function of kilograms of LPG consumed per year per household from nationally representative survey data collected in 2019. We map consumption to personal PM<sub>2.5</sub> exposures, drawing on a recent clinical trial of a free LPG stove and fuel intervention where PM<sub>2.5</sub> exposures were extensively measured (8). Using LPG price elasticities recovered from a randomized subsidy experiment in rural India among PMUY beneficiaries (15), we estimate that, with the LPG subsidy, LPG consumption increases and personal PM<sub>2.5</sub> exposures decrease. Using existing exposure-mortality risk curves (13) and population data from 2023-2030, we translate estimated increased PM<sub>2.5</sub> exposures to changes in relative risks and predicted yearly crude mortality rates.

With even the smallest subsidy, we estimate an average of 295,000 premature deaths averted by 2030; averted deaths are three times larger when refills are subsidized down to 550 INR (see SM). For climate impacts, we predict that LPG subsidies avoided 3.7-7.5 megatonnes CO<sub>2e</sub>. After applying a social discount rate of 9% (see SM), averted mortality benefits total \$142-438 billion and avoided CO<sub>2e</sub> emissions total \$0.6-1.1 billion; in comparison, LPG subsidies could be expected to cost around \$53-144 billion.

**Encouraging clean cooking through the removal of a value added tax in Kenya**

In Kenya, LPG use has grown in the last fifteen years: from 4% of households primarily using LPG in 2006, to 13% in 2016, to 30% in 2022. In recent years, Kenya has experimented with a value-added tax on LPG: first, the long-standing 16% VAT was reduced to 0% in 2016 to encourage LPG adoption; it was then re-established at 16% in 2021 in response to the financial pressures of COVID-19; most recently, in July 2022, the VAT was halved to 8% to enhance affordability during international petroleum price surges.

To model the health and climate benefits of the potential removal of the VAT between 2023-2030, we first generate estimates of yearly LPG consumption among LPG users in Kenya. We then map LPG consumption to mean personal PM<sub>2.5</sub> exposures, drawing on Kenya-specific estimates. Next, we use recent observational evidence of within-household declines in LPG consumption due to the reinstatement of the VAT in 2021 to infer household price sensitivities. We apply these price sensitivities (1) to a case where the 16% VAT is removed and prices decline by proportionally and (2) to an alternative scenario where the VAT is 8%. Beyond the increase in consumption among current LPG users, historical evidence suggests that the removal of the VAT may encourage further LPG adoption among current non-adopters. Therefore, we additionally simulate varying levels of increasing LPG adoption at 0.5% (baseline), 1% (8% VAT), and 1.5% (0% VAT) per year. As in our India case study, we then relate population shifts in LPG consumption to changes in pollution exposures and to relative risks of mortality, and then apply these estimates to predicted yearly crude mortality rates and population data to estimate changes in mortality (see SM). We similarly infer changes in biomass consumption and estimate changes in CO<sub>2e</sub> emitted due to the VAT removal using energy equivalences (see SM).

In the absence of the VAT, we estimate that 30,000 premature deaths would be averted between 2023-2030 in Kenya, decreasing household air pollution related mortality in the



country by about 20%. If the VAT were halved, our estimates are reduced by one-third.

Without the VAT, net CO<sub>2</sub>e is reduced by 15 megatonnes. In total, we estimate that averted mortalities are equivalent to \$3.4 billion and averted CO<sub>2</sub>e to \$2.4 billion – biomass use is substantially less renewable in Kenya than in Ecuador, so biomass use in Kenya is relatively more emitting due to lower rates of CO<sub>2</sub> re-absorption. Of course, the VAT is an economic tool to generate capital for government expenditures; we estimate that, at current 2023 refill prices, the 16% VAT would be expected to generate \$200 million in revenue between 2023-2030 (~0.1% of expected government spending).

## Conclusions

Some caveats apply to our work. Our averted mortality estimates are sensitive to our choice of exposure-mortality relationship (16), our ability to estimate exposures under different cooking fuel scenarios, and on population and mortality data. Our cost-benefit estimates depend on the values placed on mortality and CO<sub>2</sub>. We focus on readily quantifiable benefits (mortality and emissions), and do not account for benefits of cleaner cooking to women's empowerment, reduced healthcare expenditures, and to local environments (17). We quantify costs related to directly subsidizing fuels, but broader investments along the fuel supply chain may be necessary to support growth in LPG use, though these may also offer opportunity for local job growth. We also do not directly account for household contributions to ambient air pollution, or the health effects linked to these contributions.

We conclude with two points. First, LPG subsidies are popular, which is both a benefit and a challenge. The type of path dependence observed in the development of Ecuador and India's LPG subsidies are reminiscent of the conditions that led to the development of other welfare programs (e.g., Social Security Programs), which often become too popular to remove.

In all three countries described here, governments have contended with budgetary challenges and have either shuttered or considered shuttering LPG subsidy programs (in the case of Kenya, a ‘pseudo-subsidy’ in the form of VAT relief). In Ecuador, following unrest during multiple prior attempts to reduce the LPG subsidy, the government pivoted to promoting an even cleaner alternative: induction electric cookstoves powered by renewable energy, an effort that has plausibly already begun to yield climate and health benefits (18). In India, creating widespread access to LPG for 96 million poor households was a truly remarkable feat; however, removing or substantially reducing subsidies undercuts the initiative’s substantial gains and may have long term repercussions for public health. State governments in India may pick up the slack, but budget challenges will continue. Kenya’s experience with the VAT on LPG underscores the role of financial levers in catalyzing clean cooking shifts to achieve health and climate goals. Reflecting broader innovations across sub-Saharan Africa, Kenyan businesses have highlighted the potential of pay-as-you go schemes that facilitate microtransactions for gas (19) – a model that could be integrated with targeted subsidies or credit mechanisms.

Second, LPG subsidies are largely politically and environmentally unpalatable, but the evidence presented here demands a more nuanced view. Our calculations indicate that LPG subsidies generate substantial health and climate benefits in places where biomass cooking persists. Ensuring sustained, affordable access to LPG for cooking through targeted subsidies for the poor can effectively reduce inequities in exposure to pollution and associated health impacts.

We are not advocating for indefinite fossil fuel subsidies for cooking as an end. Rather, we acknowledge fossil fuels for clean cooking as an intermediate step, utilizing transitional fuel available at scale now, towards the better solution of cooking with electricity from clean, renewable sources when those sources become accessible, reliable, and affordable. For many

around the globe, that ideal is decades away. Until then, targeted and subsidized fossil fuels can fulfill the promise of healthier lives.

## References and Notes:

1. D. Acemoglu, P. Aghion, L. Bursztyn, D. Hemous, *American Economic Review*. **102**, 131–166 (2012).
- 5 2. S. B. Vernon Antung A. Liu, Ian W. H. Parry, Nate, “IMF Fossil Fuel Subsidies Data: 2023 Update,” *IMF Working Paper* (No. 2023/169, International Monetary Fund, 2023), (available at <https://www.imf.org/en/Publications/WP/Issues/2023/08/22/IMF-Fossil-Fuel-Subsidies-Data-2023-Update-537281>).
- 10 3. International Energy Agency, “Global Energy Review: CO2 Emissions in 2021” (International Energy Agency, 2022), (available at <https://www.iea.org/reports/global-energy-review-co2-emissions-in-2021-2>).
4. J. Lelieveld, J. S. Evans, M. Fnais, D. Giannadaki, A. Pozzer, *Nature*. **525**, 367–371 (2015).
5. International Energy Agency, “World Energy Outlook 2022” (International Energy Agency, 2022), (available at <https://www.iea.org/reports/world-energy-outlook-2022>).
- 15 6. R. Bailis, R. Drigo, A. Ghilardi, O. Masera, *Nature Climate Change*. **5**, 266–272 (2015).
7. C. J. L. Murray *et al.*, *The Lancet*. **396**, 1223–1249 (2020).
8. M. Johnson *et al.*, *Environ Health Perspect.* **130**, 097005 (2022).
9. S. N. Chillrud *et al.*, *Journal of Exposure Science & Environmental Epidemiology*, 1–16 (2021).
- 20 10. E. Floess *et al.*, *Environ. Res. Lett.* **18**, 034010 (2023).
11. A. Gill-Wiehl, I. Ray, D. Kammen, *Renewable and Sustainable Energy Reviews*. **151**, 111537 (2021).
12. S. B. Berkouwer, J. T. Dean, *American Economic Review*. **112**, 3291–3330 (2022).
13. R. Burnett *et al.*, *Proc. Natl. Acad. Sci. U.S.A.* **115**, 9592–9597 (2018).
- 25 14. Ministry of Petroleum & Natural Gas, “Demand for Grants 2023-24 Analysis : Petroleum and Natural Gas,” *Budgets*, (available at <https://prsindia.org/budgets/parliament/demand-for-grants-2023-24-analysis-petroleum-and-natural-gas>).
15. M. Jeuland *et al.*, *World Development Perspectives*. **30**, 100490 (2023).
16. R. C. Nethery, F. Dominici, *European Heart Journal*. **40**, 1597–1599 (2019).
- 30 17. J. Rosenthal, A. Quinn, A. P. Grieshop, A. Pillarisetti, R. I. Glass, *Energy for Sustainable Development*. **42**, 152–159 (2018).
18. C. F. Gould *et al.*, *Proc. Natl. Acad. Sci. U.S.A.* **120**, e2301061120 (2023).

19. M. Shupler *et al.*, *Applied Energy*. **292**, 116769 (2021).

## Acknowledgments:

We gratefully acknowledge inspiration from the work of and conversations with Kirk R. Smith, Gautam Yadama, and Josh Rosenthal, among others.

## Funding:

5 US National Institutes of Health grant 1UM1HL134590 in collaboration with the Bill and Melinda Gates Foundation (OPP1131279) (AP)

Clean Cooking Implementation Science Network of the US National Institutes of Health (AP)

## Author contributions:

10 Conceptualization: CFG, AP

Methodology: CFG, AP, SBS, MB, RB

Formal Analysis: CFG, AP, SBS

Resources: SBS, RB

Writing – Original Draft: CFG, AP, SBS

15 Writing – Review & Editing: All

**Competing interests:** Authors declare that they have no competing interests.

**Data and materials availability:** All data and code necessary to reproduce the analysis will be made publicly available upon publication.

## Supplementary Materials:

20 Supplementary Text

Figs. S1 to S10

Tables S1 to S7

**Table 1. Health and climate impacts of LPG subsidies in Ecuador, India, and Kenya**

**Ecuador, 1979–2019**

|                                                  |                 |
|--------------------------------------------------|-----------------|
| LPG-using households (2019)                      | 4 million       |
| Consumer LPG refills costs (1979-2019)           |                 |
| Subsidized                                       | \$0.17/kg       |
| Market                                           | \$0.54/kg       |
| Total LPG subsidy cost                           | \$13 billion    |
| Net climate and health benefits from LPG subsidy | \$73 billion    |
| Total averted deaths                             | 96 thousand     |
| Net CO <sub>2</sub> e avoided                    | 0.05 megatonnes |

**India, 2023–2030**

|                                              |                    |
|----------------------------------------------|--------------------|
| PMUY-benefitting households                  | 96 million         |
| Consumer LPG refills costs                   |                    |
| Subsidized (50%; 550 INR lower)              | \$0.47/kg          |
| Subsidized (36%; 400 INR lower)              | \$0.59/kg          |
| Subsidized (18%; 200 INR lower)              | \$0.76/kg          |
| Market                                       | \$0.93/kg          |
| Total LPG subsidy cost                       | \$53-144 billion   |
| Net climate and health benefits from subsidy | \$143-439 billion  |
| Total averted deaths                         | 295-912 thousand   |
| Net CO <sub>2</sub> e avoided                | 3.7-7.5 megatonnes |

**Kenya, 2023–2030**

|                                                  |                   |
|--------------------------------------------------|-------------------|
| LPG-using households                             | 30 million        |
| Consumer LPG refills costs                       |                   |
| Subsidized (0% VAT)                              | \$1.45/kg         |
| Subsidized (8% VAT)                              | \$1.59/kg         |
| Market (16% VAT)                                 | \$1.73/kg         |
| Total anticipated VAT revenue                    | \$0.1-0.2 billion |
| Net climate and health benefits from VAT removal | \$3.7-5.8 billion |
| Total averted deaths                             | 11-18 thousand    |
| Net CO <sub>2</sub> e avoided                    | 10-26 megatonnes  |

LPG = liquified petroleum gas; CO<sub>2</sub>e = carbon dioxide equivalent; PMUY = *Pradhan Mantri*

*Ujjwala Yojana*; INR = Indian Rupee (83.17 INR = 1 USD as of October 16, 2023); VAT =

value added tax



## Supplemental Information for:

### **In praise of fossil fuel subsidies (for cooking)<sup>‡</sup>**

Carlos F. Gould<sup>1\*</sup>, Rob Bailis<sup>2</sup>, Kalpana Balakrishnan<sup>3</sup>, Marshall Burke<sup>4,5,6</sup>, Sebastián Espinoza<sup>7</sup>, Sumi Mehta<sup>8</sup>, Samuel B. Schlesinger<sup>9</sup>, José Ricardo Suárez<sup>1</sup>, Ajay Pillarisetti

10

#### **Affiliations:**

<sup>1</sup>Herbert Wertheim School of Public Health and Longevity Science, University of California, San Diego; San Diego, USA

<sup>2</sup>Stockholm Environment Institute; Somerville, USA

<sup>3</sup>Department of Environmental Health Engineering, Faculty of Public Health, Sri Ramachandra Institute of Higher Education and Research; Chennai, India

<sup>4</sup>Doerr School of Sustainability, Stanford University; Stanford, USA

<sup>5</sup>Center for Food, Security, and Environment, Stanford University; Stanford, USA

<sup>6</sup>National Bureau of Economic Research; Cambridge, USA

<sup>7</sup>Instituto de Investigación Geológico y Energético; Quito, Ecuador

<sup>8</sup>Vital Strategies; New York, USA

<sup>9</sup>Independent Consultant; Quito, Ecuador

<sup>10</sup>School of Public Health, University of California, Berkeley; Berkeley, USA

\*Corresponding author. Email: [cagould@health.ucsd.edu](mailto:cagould@health.ucsd.edu)

---

<sup>‡</sup> Our title draws inspiration from Kirk R. Smith (2002) ‘In praise of petroleum?’ *Science* and Kirk R. Smith (2014) ‘In praise of power’ *Science*.

## Table of contents

|                                                                                  |    |
|----------------------------------------------------------------------------------|----|
| <i>Context of cooking fuel programs in Ecuador, India, and Kenya</i>             | 3  |
| <i>Ecuador case study</i>                                                        | 4  |
| Data sources                                                                     | 4  |
| Modeled integrated exposure-response based estimates, 1979–2019                  | 7  |
| Regression-based estimates of health benefits, 1990–2019                         | 16 |
| <i>India case study</i>                                                          | 24 |
| Data sources and inputs                                                          | 24 |
| Mortality modeling                                                               | 30 |
| <i>Kenya case study</i>                                                          | 35 |
| Data sources                                                                     | 35 |
| Mortality modeling                                                               | 41 |
| <i>Estimating greenhouse gas emissions differences in all three case studies</i> | 48 |
| Ecuador                                                                          | 48 |
| India                                                                            | 49 |
| Kenya                                                                            | 50 |
| Monetizing CO2 emissions                                                         | 51 |
| <i>References</i>                                                                | 52 |

## **Context of cooking fuel programs in Ecuador, India, and Kenya**

It is worth directly comparing the context of LPG and related programs in Ecuador, India, and Kenya. In Ecuador, LPG cylinder refill costs for all residential consumers are directly subsidized at point of sale (subsidy is ~\$0.67/kg, 90% market cost). Since there is no restriction on the number of cylinder refills that can be purchased for most of the country, this universal and untracked subsidy leads to disproportionate subsidy capture by the wealthy (though use among the comparatively less wealthy is still high). There is also some leakage, both to neighboring countries and non-residential users. In India, LPG cylinder refills are purchased at market rates and subsidies are subsequently deposited into customers' bank accounts (~\$0.33/kg, 45% market cost). LPG cylinder refill costs are centrally dictated each month and there is little variation in costs within states. Eligible (income-poor) customers can avail themselves of nine subsidized refills yearly. India's direct-deposit approach limits leakage and can enable flexible subsidy targeting; however, it also introduces barriers for the unbanked and for those that struggle to pay the upfront cost. In Kenya, LPG prices are not controlled and are directly influenced by international markets. As part of efforts to expand LPG use to 35% of the population primarily cooking with LPG by 2030 (from 20% in 2016), the Kenyan Treasury removed the 16% VAT on LPG, which effectively served as a 16% price cut for consumers. However, the 16% VAT on LPG was reinstated in 2021 amid COVID-19 related budgetary strain. As a result, LPG prices rose to \$1.62/kg and have recently reached \$1.73/kg.

## **Ecuador case study**

### **Data sources**

Here we list some parameters and data sources in more detail than in the main text.

- Ecuador’s historical LPG sales volume and subsidies data come from multi-annual reports by PetroEcuador, the state petroleum company which, together with its predecessor entities, has held a monopoly on LPG importation and wholesaling throughout the period under study. Consumer prices can be found on [p.170](#) and annual consumption can be found on [p.102](#) of PetroEcuador report ‘40 years building the development of the country, 1972–2012.’
- Exchange rates between the US dollar and Sucre (Ecuador’s national currency until early 2000, when the country began using the US dollar as its official currency) were calculated using data downloaded from the Banco Central de Ecuador ([here](#)). Conversion factors were applied to convert Sucres into current-year US dollars, and to convert current-year dollars into May 2023 dollars (Bureau of Labor Statistics [here](#)).
- Ecuador’s historical GDP data come from the World Bank (available [here](#)).
- The Central Bank also collects and publishes data from PetroEcuador, including quarterly statistics on annual LPG imports and sales, which were used to crosscheck and fill gaps in the data from PetroEcuador-published reports.
- The cost of Ecuador’s LPG subsidy was determined by multiplying the country’s annual consumption by the difference between the subsidized consumer price and the international wholesaler and producer price (data from [EIA](#) and [FRED](#) producer price index; propane using Dec 2022 as index=100).

This analysis makes several assumptions to bridge data gaps: first, domestic LPG production is treated as equivalent to imported fuel. Domestic production volume has been stagnant since the mid-1990s and has accounted for roughly one-fifth of overall consumption since 2000. As domestic production has largely come under the aegis of PetroEcuador, we treat unrealized income (from the potential sale of this LPG at market prices) as equivalent to the cost of imported fuel. Second, our estimations conservatively treat all LPG sales within the country as fully subsidized. While household use of LPG represents most of the internal market (>90% over the last decade), a complex and evolving set of price points have been fixed for industrial, agricultural, and transportation uses of LPG. However, data gaps on LPG use in these sectors for the majority of the years under analysis prevent the inclusion of this detail. Finally, our use of average annual international wholesale prices and US prices received by LPG producers for the period prior to 2011 represents an imperfect estimate, and likely an underestimate, of the cost paid by Ecuador's government for imported LPG, which must cover shipping and logistics costs, in addition to being subject to the volatility of the LPG market at the moment that import contracts are signed. Estimates of LPG consumer costs and LPG subsidy costs to the government are in Figure S1 (below).

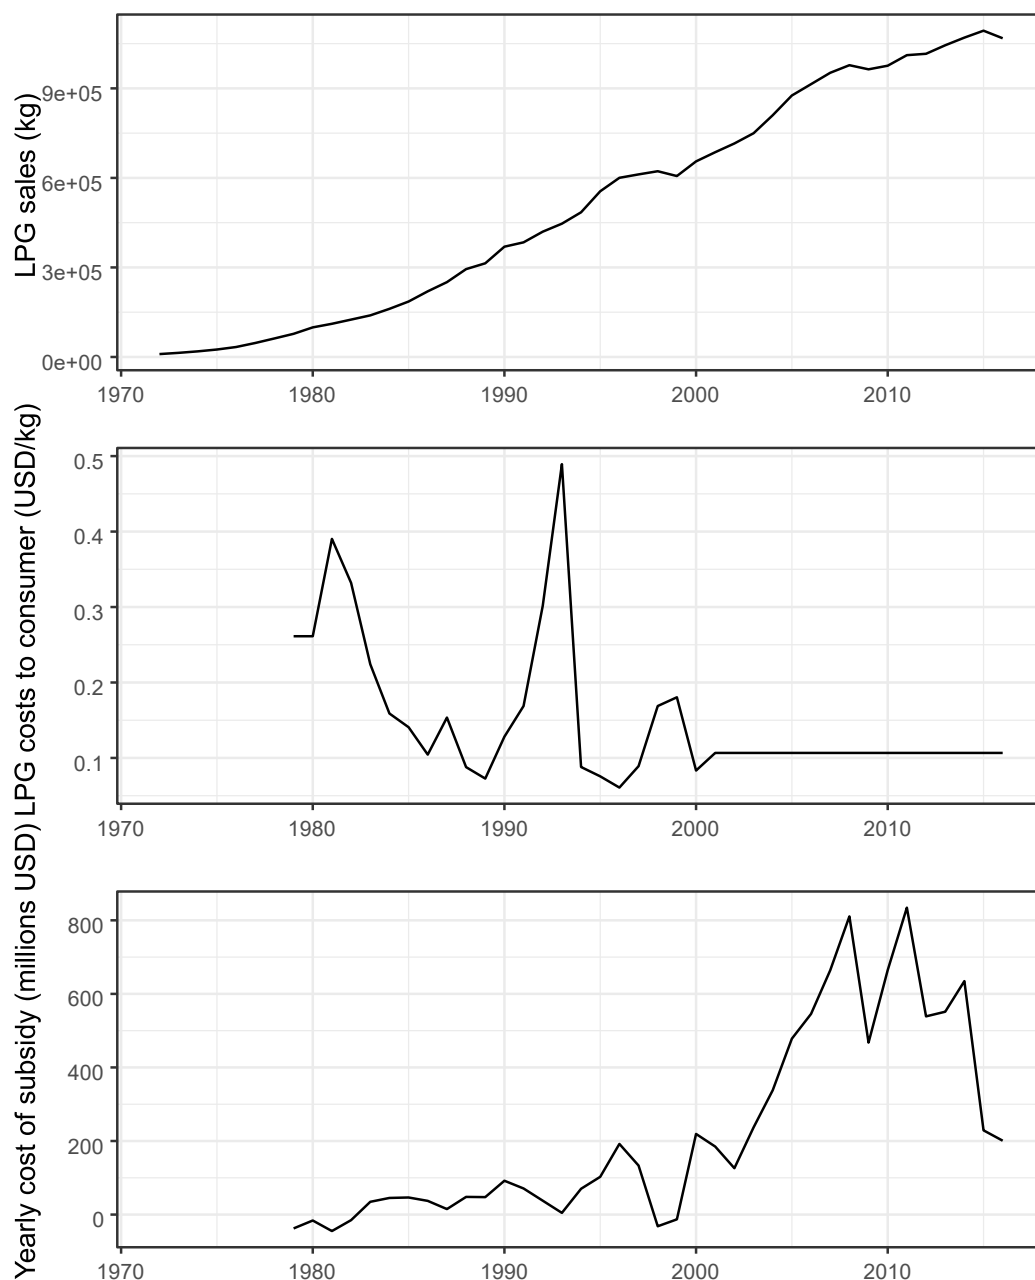

**Figure S1: Ecuador LPG sales and costs.** The top panel is the cost of LPG to the consumer in USD/kg; the lower panel is the cost of the subsidy to the Ecuadorian Government in millions of USD.

### Modeling mortality and estimating its value, 1979-2019

Our modeled estimates of the averted mortality from clean cooking fuel scale up in Ecuador rely on yearly nationwide observed % primary clean cooking fuel use, predicted % primary clean cooking fuel use absent the subsidy, all-cause all-age mortality rates, average PM<sub>2.5</sub> exposure estimates for those using clean cooking fuels primarily and those that are not, and an exposure-response function that translates those exposures into changes in all-age all-cause mortality risk.

Figure S2 illustrates observed and counterfactual clean cooking fuel trajectories. The observed trajectory is derived by linearly interpolating the percent primary clean cooking fuel use variable derived from Census years 1974, 1982, 1990, 2000, 2010, and a combined set of nationally-representative surveys conducted between 2015–2019 (whose mean value we place at 2019). The 20 year delayed trajectory is calculated by starting at 6.55% in 1974 (no difference to observed), increasing to 9.91% in 1984 (the value Ecuador had reached in 1975), increasing to 26.71% by 1994 (1980), increasing to 39.57% in 2004 (1984), and maintaining the 20y delayed gap thereon. The 10y delayed trajectory is calculated by starting at 6.55% in 1974 (no difference to observed), increasing to 23.35% in 1984 (the value Ecuador had reached in 1979), increasing to 39.57% by 1994 (the value reached in 1984), and maintaining the 10y delayed gap thereon.

Figure S3 compares our data to modeled data from the World Health Organization.<sup>(1)</sup> We show the modeled data from Ecuador, Colombia, Peru, and Bolivia, as well as our own data. As can be seen quite clearly, the modeled data (only available from

1990 to present) differ substantially from our calculated estimates from the Census data. In 1990, Stoner et al. estimate that 73% of Ecuadorian households primarily cooked with a clean fuel and technology. The Census indicates that in 1990 that figure only stood at 58%, a difference of 15%. Of course, it is not possible to simply ‘penalize’ all countries by this difference; while our 20y delayed trajectory appears to be well below all other countries, it remains fairly similar to Peru which was 20% in 1990. It is important to note that both Colombia and Bolivia have had varying levels of cooking gas subsidies for decades, thanks to their own domestic petroleum resources, and thus do not represent an appropriate counterfactual for Ecuador without a cooking gas subsidy. Additionally, Peru has had an active LPG promotion (and subsidy) program – *Fondo de Inclusión Social Energético* (Social Energy Inclusion Fund, FISE) – since 2012. Despite these variations between countries, we feel the comparison apt, as Peru, Columbia, and Bolivia are often considered peers of Ecuador.

Yearly nationwide data on population and mortality are derived from the United Nations World Population Prospects 2022 (available [here](#)) and are visualized in Figure S4.

Exposure contrasts are derived from ref. (2) and are as follows:  $50 \mu\text{g}/\text{m}^3$  (sd =  $20 \mu\text{g}/\text{m}^3$ ) polluting and  $25 \mu\text{g}/\text{m}^3$  ( $10 \mu\text{g}/\text{m}^3$ ) clean. For each bootstrapped run, we draw from a truncated normal distribution where the mean and SD are as described above, the minimum is  $5 \mu\text{g}/\text{m}^3$  for both polluting and clean fuels, and the maximum is  $150 \mu\text{g}/\text{m}^3$  for polluting and for clean fuels. The maximum was the randomly selected level for the polluting group, ensuring that the clean group had either the same exposure or lower (Table S1).



For the exposure-response relationship (for Ecuador, India, and Kenya), we applied the Global Exposure Mortality Model (GEMM).<sup>(3)</sup> The GEMM provides hazard functions derived from 41 cohort studies across 16 countries, including high PM<sub>2.5</sub> contexts, and removes the use of secondhand smoking studies to cover these high concentrations and to provide an upper exposure bound. Our outcome of interest is nonaccidental mortality; we apply the 25 years and older category from the GEMM to our populations. The GEMM inputs and resulting curve is shown in Figure S5. The inputs are drawn from an excel file downloaded from the Supplemental Information from the paper describing the GEMM and its application (Burnett et al. (2018)).

As noted elsewhere,<sup>(4, 5)</sup> the choice of exposure-response relationship can highly impact modeled estimates of air pollution attributable mortality, especially at high concentrations (by 2x, at times). In addition to its strengths noted above, we choose the GEMM because its parameters are publicly available and easily implemented.

We select a preferred Value of a Statistical Life (VSL) of 820,000 USD from <sup>(6)</sup>. Other values are possible, however: 400,000 USD in 2019 dollars <sup>(7)</sup> and 2.15 million USD in 2020 dollars <sup>(8)</sup>. For reference, in the US, The Department of Health and Human Services recommends using an \$11.4 million VSL, The Department of Transportation recommends an \$11.7 million VSL, and the Environmental Protection Agency recommends a \$10.8 million VSL (US\$2020). We test two alternatives: 400,000 USD and 2.15 million USD. The low VSL yields estimated additional damages: mean 78 billion USD (SD 53 billion USD), median 70 billion USD (IQR, 35–111 billion USD). The high VSL yields estimated

additional damages: mean 273 billion USD (SD 185 billion USD), median 245 billion USD (IQR, 122–387 billion USD).

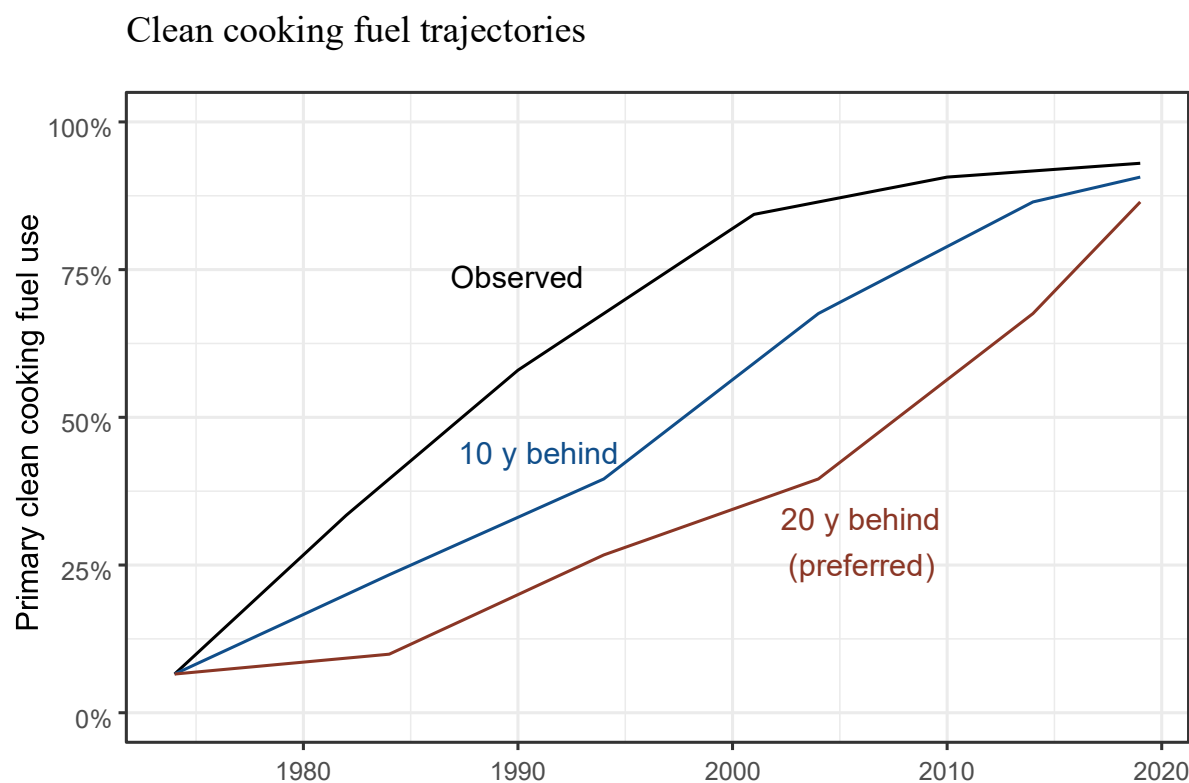

**Figure S2: Alternative clean cooking fuel trajectories for Ecuador.** The black line is what was observed from census and population representative surveys conducted between 1970 – 2020; the blue and red lines represent lagged adoption and use of LPG as counterfactuals.

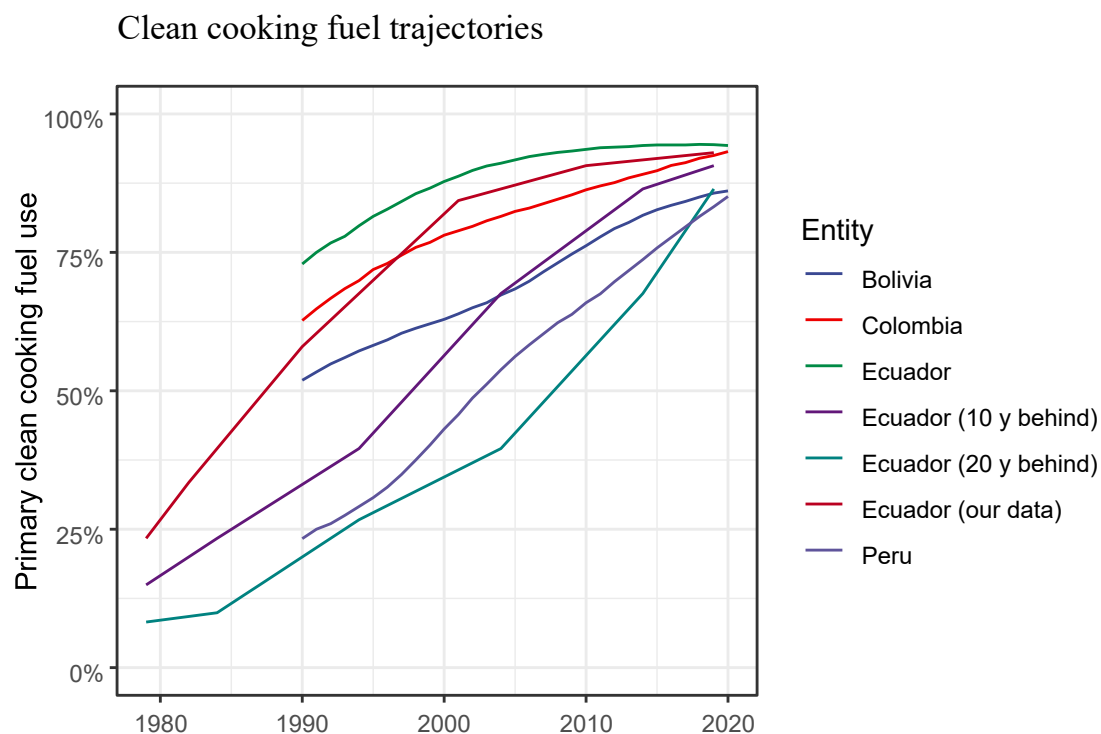

**Figure S3: Comparing neighboring and similar country's primary clean cooking fuel trajectories.**

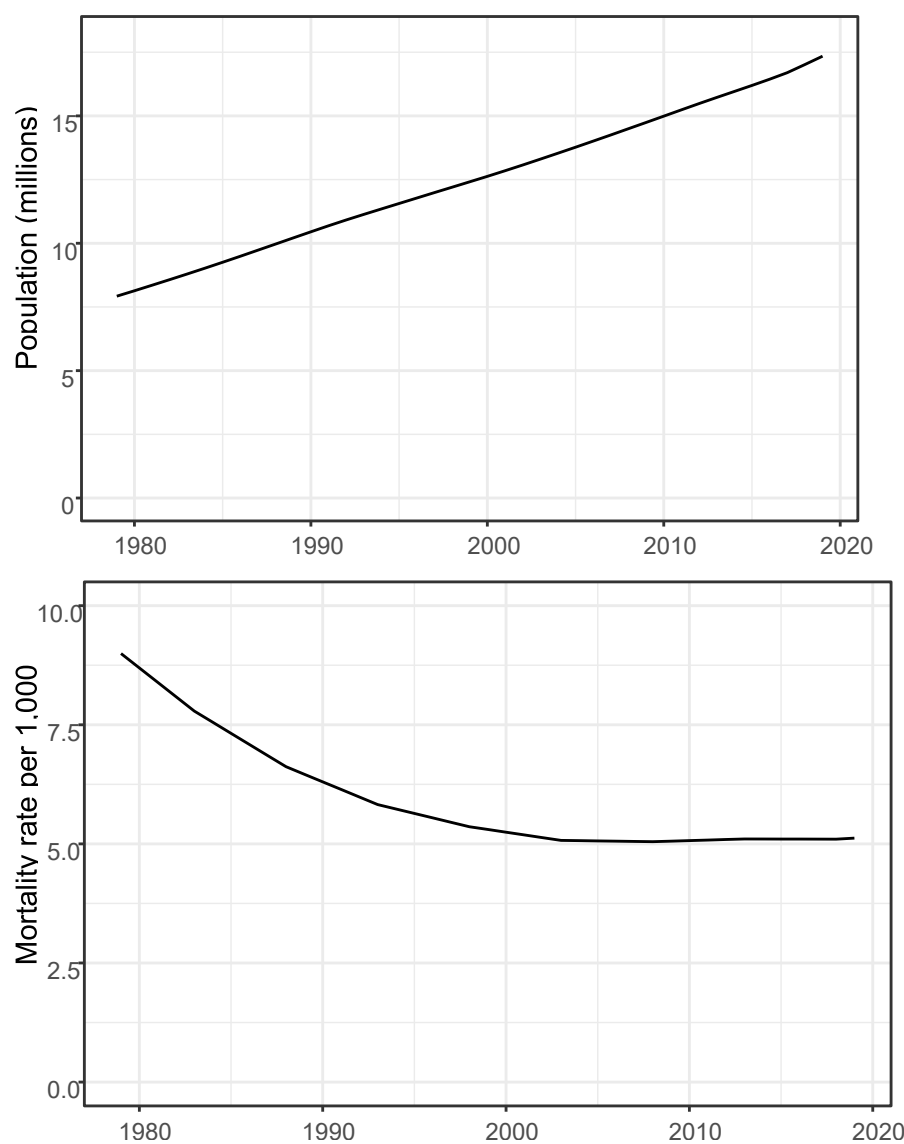

**Figure S4: Ecuador population and crude mortality rate, 1979–2019.** The upper panel is population in millions; the lower panel is the mortality rate per 1000.

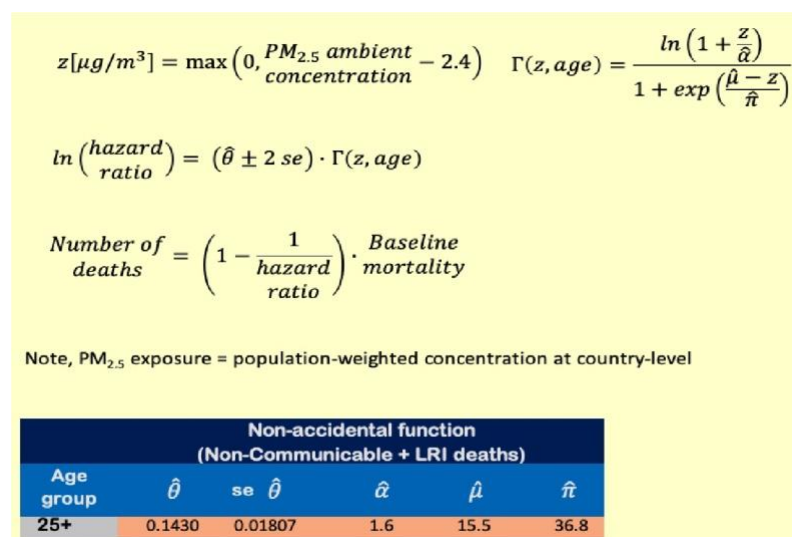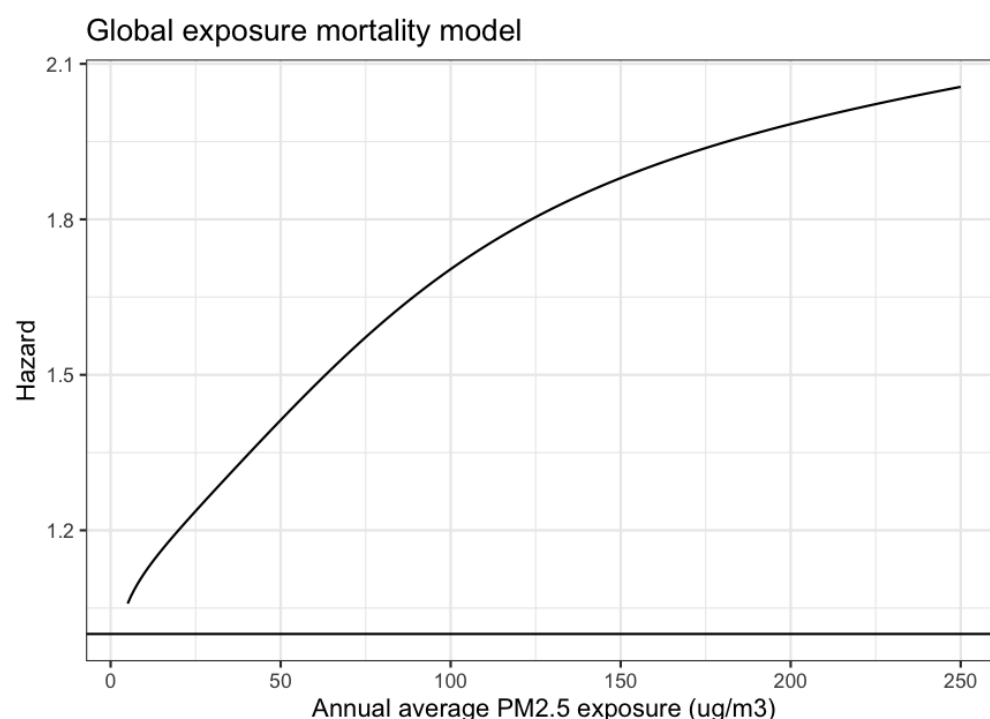

**Figure 5: Summary of the global exposure mortality model (GEMM) which relates annual average fine particulate matter (x-axis) to all-cause mortality hazard (y-axis) relative to a theoretical minimum level of exposure of  $2.4 \mu g/m^3$ .** Input parameters are shown on top from the supplemental excel spreadsheet of Burnett et al. 2018. Throughout our analyses, we rely on the GEMM for estimating predicted  $PM_{2.5}$ -related mortalities and changes according to shifts in average  $PM_{2.5}$  exposures.

Table S1: Ecuador modeled exposure response results, 1979–2019.

|                                                          | Overall (N=1000)                  |
|----------------------------------------------------------|-----------------------------------|
| Clean group mean PM2.5 exposure, $\mu\text{gm}^{-3}$     |                                   |
| Mean (SD)                                                | 21.14 (9.32)                      |
| Median (IQR)                                             | 20.50 (14.70, 27.28)              |
| Polluting group mean PM2.5 exposure, $\mu\text{gm}^{-3}$ |                                   |
| Mean (SD)                                                | 47.39 (19.22)                     |
| Median (IQR)                                             | 47.39 (33.90, 60.41)              |
| Mortality change, 10 y delayed                           |                                   |
| Mean (SD)                                                | -45406.94 (28794.37)              |
| Median (IQR)                                             | -44180.47 (-66260.62, -21399.72)  |
| USD value of mortality change, 10 y delayed              |                                   |
| Mean (SD)                                                | -22.69 (14.39) billion            |
| Median (IQR)                                             | -22.08 (-33.12, -10.70) billion   |
| USD value of mortality change, 10 y delayed (Low VSL)    |                                   |
| Mean (SD)                                                | -11.07 (7.02) billion             |
| Median (IQR)                                             | -10.77 (-16.15, -5.22) billion    |
| USD value of mortality change, 10 y delayed (High VSL)   |                                   |
| Mean (SD)                                                | -59.50 (37.73) billion            |
| Median (IQR)                                             | -57.90 (-86.83, -28.04) billion   |
| Mortality change, 20 y delayed                           |                                   |
| Mean (SD)                                                | -91983.82 (58330.64)              |
| Median (IQR)                                             | -89499.28 (-134228.49, -43350.81) |
| USD value of mortality change, 20 y delayed              |                                   |
| Mean (SD)                                                | -49.06 (31.11) billion            |
| Median (IQR)                                             | -47.73 (-71.59, -23.12) billion   |
| USD value of mortality change, 20 y delayed (Low VSL)    |                                   |
| Mean (SD)                                                | -23.93 (15.18) billion            |
| Median (IQR)                                             | -23.28 (-34.92, -11.28) billion   |
| USD value of mortality change, 20 y delayed (High VSL)   |                                   |
| Mean (SD)                                                | -128.62 (81.57) billion           |
| Median (IQR)                                             | -125.15 (-187.70, -60.62) billion |

## Regression-based estimates of health benefits, 1990–2019

As a complement to our theoretical analysis detailed above, we additionally conducted regression-based estimates of health benefits from 1990 to 2019. This analysis builds on previous work<sup>1</sup> where we estimated the impact of LPG scale-up from 1990 to 2019 on under-5 lower respiratory infections mortality (but is unpublished elsewhere). In comparison to Gould et al. (2023)(9), our approach differs in a few respects. First, our outcome of interest is all-cause, all-age mortality to more fully capture the potential benefits of clean fuel scale up. Second, to quantify uncertainties, we bootstrap 95% confidence intervals by sampling cantons with replacement. Third, we generate population averaged estimates by weighting canton-months according to their population in our regression.

To model the relationship between all-cause mortality and clean fuel, we estimate the following regression:

$$\log(y_{cy}) = \beta P_{cy} + \lambda_{cy} + \mu_c + \gamma_y + \theta_{cy} + \varepsilon_{cy} \quad (1)$$

using ordinary least squares, where  $c$  indexes cantons and  $y$  indexes year.  $y_{cy}$  is the log of the yearly canton-level all-cause, all-age mortality rate and  $P_{cm}$  is the proportion of households primarily cooking with a clean-burning cooking fuel in the same canton-year.  $\lambda_{cy}$  is a vector of canton-year control variables, including the fraction of households that are classified as rural, the fraction of households that are grid electrified, a composite index of household building materials (roof, wall, floor) intended to serve as a proxy for infrastructure and wealth, toilet type intended to serve as a proxy for water, sanitation, and hygiene practices and wealth, the fraction of adult women that are literate, the fraction of girls under 18 years that are in school,



the fraction of households where an individual speaks an indigenous language, and a composite index of under-5 vaccination rates (for more details see ref. (9)).  $\mu_c$  is a vector of canton fixed effects that account for all locality-specific time-invariant characteristics correlated with either LPG scale up or mortality rates. To account for longer-term trends in LPG scale up and mortality rates, we include a vector of year fixed effects  $\gamma_m$ , which account for any time-trending differences in either LPG scale up or mortality rates that are common to all cantons. Regressions were weighted by canton population and standard errors were clustered at the canton level.

We quantify uncertainty in this analysis by bootstrapping the regression 1,000 times by sampling cantons with replacement. We present the mean coefficient estimate as the central estimate and the 2.5th percentile and 97.5th percentile as the 95% confidence interval.

Our preferred specification relates canton-year mortality rates with the fraction of households primarily cooking with a clean-burning fuels, controlling for a range of covariates and including canton and year fixed effects and weighting by canton population (Figure S6). Table S2 shows results from our regression where we do not include controls and do not include population weights. Table S3 shows the same, but rather than conducting a canton-year analysis we conduct a canton-period analysis where we do not interpolate between census years. Here, we group years into four periods: 1988-1992, 1998-2002, 2008-2012, and 2015-2019. Here, the outcome is averaged yearly canton mortality rates across those time periods (note: 1988-1992 mortality rates are averaged from 1990-1992 only due to data availability). This approach mirrors ref. (9). The results are largely unchanged.

One might also be concerned that our results are sensitive to our selection of control variables. While these are theoretically motivated to cover multiple domains that might be correlated with both all-cause mortality rates and clean cooking fuel scale-up from 1990–2019 and the canton-year level, there are some others that could be selected as well. We test the full range of combinations of our included control variables as well three more (the fraction of pregnant women that received antenatal care, the fraction of children under 5 years that received three doses of the pneumococcal conjugate vaccine (introduced in 2010), and a composite index of household sanitation practices (source of household water, trash disposal practices, toilet type, and presence of a private household shower). In total, there were 2,054 combinations. These are displayed in Figure S7. Per 10 percentage point increase in the fraction of households primarily cooking with a clean burning cooking fuel, we observed a decline in all-cause mortality rate of an average of -5.4% (the median was -4.9% (IQR, -2.7% to -7.6%)) across all combinations of controls.

### Benchmarking estimates with the Global Burden of Disease

We benchmark our two approaches using estimates from the Global Burden of Disease (GBD). The GBD estimates mortality from household air pollution by collecting data on exposure, health endpoints, and population demographics and applying these country-level statistics to modeled concentration-response functions over time. GBD models indicate that 27,000 more deaths would have occurred had household air pollution levels stayed fixed from 1990–2019, i.e., 30 years of 1990 household air pollution mortality estimates exceed the

‘observed’ household air pollution related mortality estimates by 27,000 deaths. Our first approach based on vital statistics yields an estimate of 34,500 excess deaths; our second model-based approach estimates 39,000 excess deaths.

Table S2: Ecuador regression-based results from canton-year analysis, 1990–2019.

| Dependent Variable:                                      | log(all-cause mortality rate) |                        |                        |                      |
|----------------------------------------------------------|-------------------------------|------------------------|------------------------|----------------------|
| Model:                                                   | (1)                           | (2)                    | (3)                    | (4)                  |
| <i>Variables</i>                                         |                               |                        |                        |                      |
| % primary clean cooking fuel (per 10 p.p.)               | -0.0602***<br>(0.0163)        | -0.1375***<br>(0.0208) | -0.0463***<br>(0.0163) | -0.0398*<br>(0.0239) |
| <i>Controls</i>                                          |                               |                        |                        |                      |
|                                                          |                               |                        | Yes                    | Yes                  |
| <i>Population weights</i>                                |                               |                        |                        |                      |
|                                                          |                               | Yes                    |                        | Yes                  |
| <i>Fixed-effects</i>                                     |                               |                        |                        |                      |
| Canton                                                   | Yes                           | Yes                    | Yes                    | Yes                  |
| Year                                                     | Yes                           | Yes                    | Yes                    | Yes                  |
| <i>Fit statistics</i>                                    |                               |                        |                        |                      |
| Observations                                             | 4,978                         | 4,978                  | 4,978                  | 4,978                |
| R <sup>2</sup>                                           | 0.63947                       | 0.74897                | 0.66635                | 0.78198              |
| Within R <sup>2</sup>                                    | 0.01988                       | 0.14586                | 0.09297                | 0.25819              |
| <i>Clustered (canton) standard-errors in parentheses</i> |                               |                        |                        |                      |
| <i>Signif. Codes: ***: 0.01, **: 0.05, *: 0.1</i>        |                               |                        |                        |                      |

Table S3: Ecuador regression-based results from canton-period analysis, 1990–2019.

| Dependent Variable:                                      | log(all-cause mortality rate) |                        |                       |                     |
|----------------------------------------------------------|-------------------------------|------------------------|-----------------------|---------------------|
| Model:                                                   | (1)                           | (2)                    | (3)                   | (4)                 |
| <i>Variables</i>                                         |                               |                        |                       |                     |
| % primary clean cooking fuel (per 10 p.p.)               | -0.0488***<br>(0.0168)        | -0.1265***<br>(0.0229) | -0.0367**<br>(0.0159) | -0.0352<br>(0.0231) |
| <i>Controls</i>                                          |                               |                        |                       |                     |
|                                                          |                               |                        | Yes                   | Yes                 |
| <i>Population weights</i>                                |                               |                        |                       |                     |
|                                                          |                               | Yes                    |                       | Yes                 |
| <i>Fixed-effects</i>                                     |                               |                        |                       |                     |
| Canton                                                   | Yes                           | Yes                    | Yes                   | Yes                 |
| Period                                                   | Yes                           | Yes                    | Yes                   | Yes                 |
| <i>Fit statistics</i>                                    |                               |                        |                       |                     |
| Observations                                             | 676                           | 676                    | 676                   | 676                 |
| R <sup>2</sup>                                           | 0.64918                       | 0.66675                | 0.68753               | 0.70755             |
| Within R <sup>2</sup>                                    | 0.02108                       | 0.12476                | 0.12809               | 0.23191             |
| <i>Clustered (canton) standard-errors in parentheses</i> |                               |                        |                       |                     |
| <i>Signif. Codes: ***: 0.01, **: 0.05, *: 0.1</i>        |                               |                        |                       |                     |

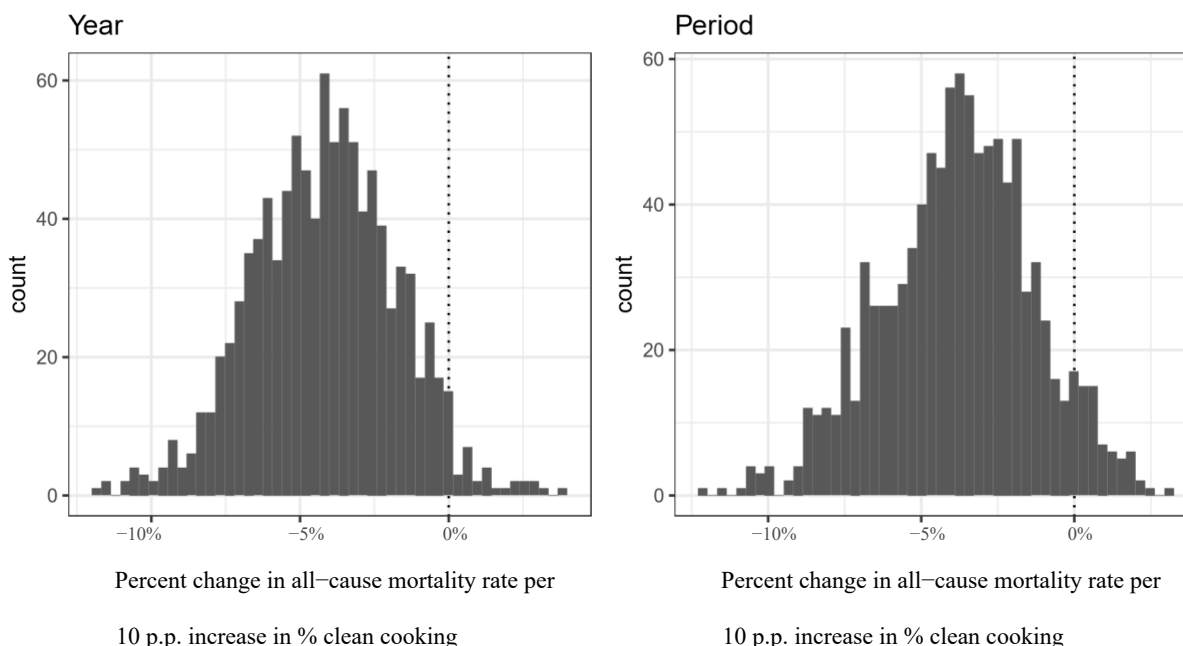

**Figure S6: Bootstrapped mortality estimates from canton-year and canton-period models.** Distribution of estimates shown from 1000 bootstrapped draws where cantons were sampled with replacement. This approach is used to quantify uncertainty in our estimates derived from the inclusion or exclusion of cantons from a theoretical superpopulation.

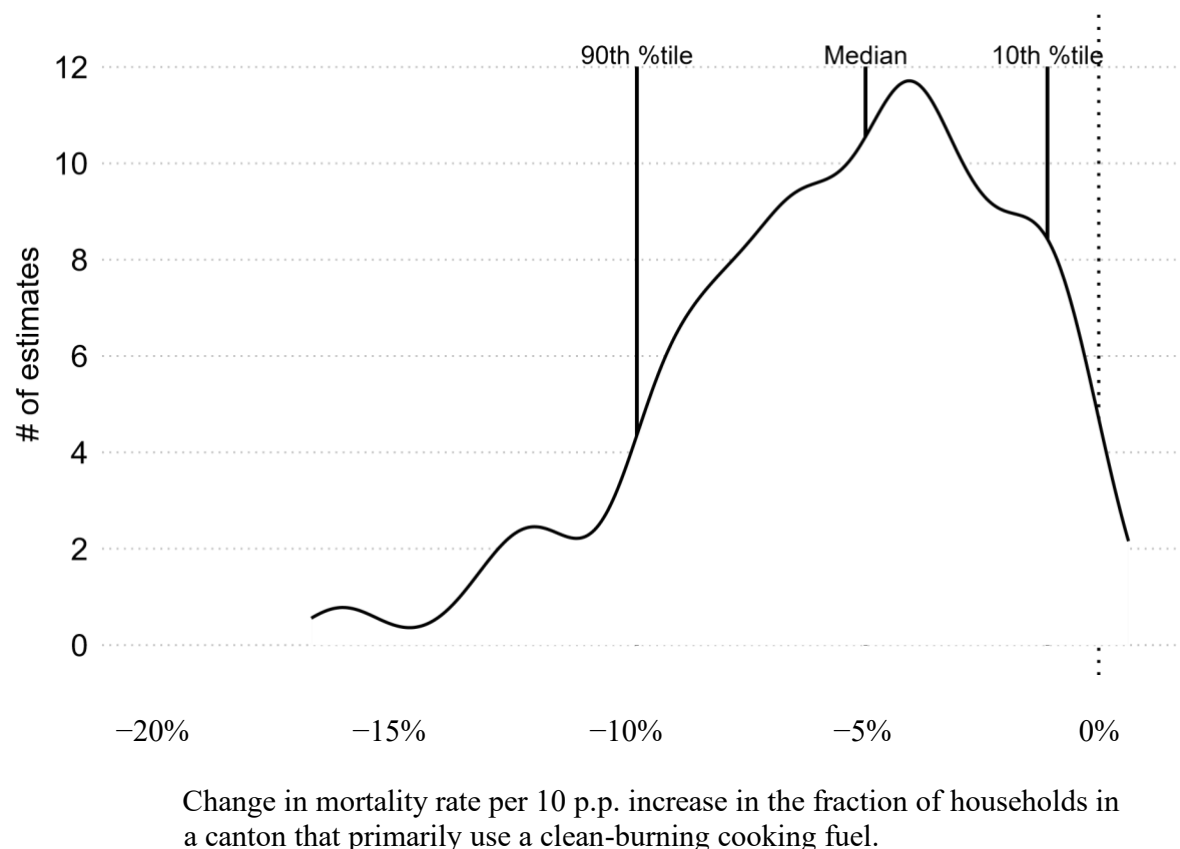

**Figure S7: Robustness of regression-based approach to alternative control combinations.**

We show the underlying distribution of all modeled estimates from the full combination of control variables. This approach shows the robustness of results to alternative selections of available control variables.

## **India case study**

The central reference provided in the main text is to India's energy budget for 2023-2024. In conjunction with budgets since 2016-2017, it is clear that investments in PMUY and subsidies have declined precipitously (see collated budget data). On August 29, 2023, the Government of India announced a cut to domestic LPG cylinder refill prices of roughly 200 INR, in response to rising inflation and high international petroleum prices; this move also comes amid ramp up for 2024 national elections in India. This brings the total subsidy rate for PMUY-eligible households to 400 INR per cylinder; other consumers receive 200 INR per cylinder. Up-to-date LPG cylinder refill prices can typically be found at <https://www.goodreturns.in/lpg-price.html>.

Central to our estimates of the health-related impacts of cooking gas subsidies in India is the logic that if the LPG cylinder refill prices increase, then LPG cylinder refill purchasing (and thereby consumption) decreases. When LPG consumption decreases, biomass combustion increases. When biomass combustion increases, personal PM<sub>2.5</sub> exposures increase, health risks increase, and at the population level public health is damaged. Similarly, given that biomass emits more greenhouse gases than LPG per unit energy delivered, CO<sub>2</sub>e emissions increase. Here, we outline specific inputs for our modeling and our approach.

### *LPG prices*

In 2019, LPG cylinder refills cost 750 INR, subsidized to 550 INR for PMUY beneficiaries. As of September 2023, LPG cylinder refills cost 900 INR, subsidized to 700 INR for PMUY beneficiaries. However, absent the recent price cut, costs would be at 1100 INR, subsidized to 900 INR for PMUY beneficiaries. Previously, budgets indicated that there would be minimal support for the LPG subsidy, indicating that it would be plausible that PMUY beneficiaries



would have to pay 1100 INR per refill. As such, we model three scenarios – 700 INR, 900 INR, and 1100 INR -- and compare them to 550 INR costs.

### *LPG price elasticity*

To estimate the extent to which LPG consumption declines with increases in refill prices, we draw on recent experimental work in Tamil Nadu, India among PMUY beneficiaries (10). Briefly, households recruited into the study were randomized to receive differing levels of subsidies for LPG cylinder refills and their refill and LPG consumption were tracked over time. Results from that study indicate strong price sensitivity, which is supported by rich observational evidence from both India and elsewhere globally. We estimate price sensitivities using results presented in Table 2 of that study, which show the mass of LPG consumed during the intervention period in kilograms across the control group and various subsidy levels (\$1.70, \$3.40, \$5.10). Using a baseline control cost of about \$7.95 per refill, we estimate price elasticity among PMUY beneficiaries by regressing the log of consumption per month (estimated as group averages divided by an intervention period length of seven months) and the log of the price. This procedure yields an estimated price elasticity of -0.33. In other words, a 1% increase in LPG cylinder refill costs results in a decline in LPG consumption of 0.33%.

Given that high consuming households also have larger incomes, we infer that they are less sensitive to price than low-consuming households—for whom a single LPG cylinder refill accounts for a larger fraction of their monthly expenditures. As such, in our preferred specification, households that consume fewer than 4 refills per year have an elasticity of -0.33, 4-9 refills per year have an elasticity of -0.2, 9-12 refills per year have an elasticity of -0.1, and those that consume more than 12 refills per year are price inelastic. In Scenario 2, all households have a price elasticity of -0.33. In scenario 3, all households have a price elasticity

of -0.10. In analyses, we randomly draw elasticity from relatively tight means/SDs for all; each elasticity must be a lower step down and never 0 (except for those than consume >12 refills per year). When reporting results, we refer to these three scenarios as “Trade-off Scenario 1”, “Trade-off Scenario 2”, and “Trade-off Scenario 3.” LPG price elasticities are referred to as Elasticity 1, 2, or 3 (in our main model they are -0.33, -0.2, and -0.1, respectively). Random draws are specified as follows (R code; `rnormTrunc` comes from the *EnvStats* package):

```
elasticity1 = rnorm(1, .33, .025)
elasticity2 = rnormTrunc(1, .2, .025, 0.1, elasticity1)
elasticity3 = rnormTrunc(1, .10, .0025, 0.01, elasticity2)
```

### LPG consumption

LPG consumption is derived from energy access survey data collected in 14,850 urban and rural households across 152 districts in India’s 21 most populous states in 2019 (11). A stratified multistage probability sampling design was implemented to achieve nationally representative data when accounting for household level survey weights. All households were asked if they had an LPG stove. If so, they were asked if they obtained their stove via PMUY. Households that had an LPG stove were also asked how many 14.2 kg LPG cylinder refills they purchased in the previous year. As such, we can estimate the distribution of LPG consumption in kg per year among PMUY beneficiaries.

We compute LPG consumption in a few steps. First, we (1) generate a 2019 density plot; (2) extract values at every 1kg between 1-200 kg/year; and (3) scale densities to sum to 1 so that every value at a 1kg increment can be considered as a % of population. Next, we estimate our ‘baseline LPG consumption’ by, for each 1kg/year, multiplying the % price change (relative to

550 INR) by the price elasticity to get declines in LPG consumption. In this ‘baseline’ scenario, LPG cylinder refill prices are 1100 INR.

To estimate the benefits of the LPG subsidy, we then re-model LPG consumption as a function of anticipated LPG cylinder refill price declines (and the price elasticities) relative to 1100 INR. For each of these scenarios (where prices are 550 INR, 700 INR, and 900 INR), we subtract kg declines from the estimated consumption in the 2023 kg/year distributions. The consumption distributions are shown in Figure S8.

### *PM<sub>2.5</sub> exposures*

There are no recent, nationally representative Indian personal air pollution exposure measurements for households that use exclusively polluting cooking fuels, that mix polluting and clean-burning fuels, and that use exclusively clean-burning fuels. However, a recent and extensive set of measurements in Tamil Nadu, India – of pregnant women, children, and other adult women in the same households – provides evidence of the effectiveness of LPG in reducing exposures when used consistently. In refs. (12, 13) biomass using households had mean PM<sub>2.5</sub> exposures of 100-120  $\mu\text{g}/\text{m}^3$ , while LPG using households had median exposures ranging between 37-39  $\mu\text{g}/\text{m}^3$ . We note that the exposures observed in Tamil Nadu are lower than the expected range for biomass using households across India, but nonetheless utilize these estimates as they result in conservative overall modeled averted mortality estimates.

We develop three scenarios to relate LPG consumption to average PM<sub>2.5</sub> exposures. For each of these models we develop a simple formula with parameters that we randomly draw from in each bootstrapped run; the LPG to PM<sub>2.5</sub> exposure relationship varies slightly across all

runs. In each run, we model all three LPG-PM2.5 relationships fully. The central responses are shown in Figure S8 and include:

(a) Our preferred, sinusoidal response where there is little movement in exposure until about two to three refills per year, then a steep decline until about eight or nine, at which point the response levels off.

(b) A sinusoidal response that can be considered to be somewhat more pessimistic about how much LPG consumption results in declines in exposure. In other words, more LPG consumption is needed to effectively reduce PM2.5 exposures.

(c) A linear response from the maximum exposure (1 kg) to the minimum (200 kg).

In each bootstrap we run all three scenarios and perturb their parameters somewhat (slightly higher/lower max/min, earlier/later, steeper/shallower declines). Specific R code to do so is shown below:

```
min1 = rnorm(1, 25, 5)
max1 = rnorm(1, 100, 5)
decline1 = rnorm(1, 70, 2.5)
exp1 = rnorm(1, 4, .05)
exp2 = rnorm(1, 8, .1)

x=0:200

PM25_a=min1 + (max1-min1) / (1 + (x/decline1)^exp1)
PM25_b=min1 + (max1-min1) / (1 + (x/max1)^exp1)
PM25_c=max1 - ((max1 - min1) / 200)*x
```

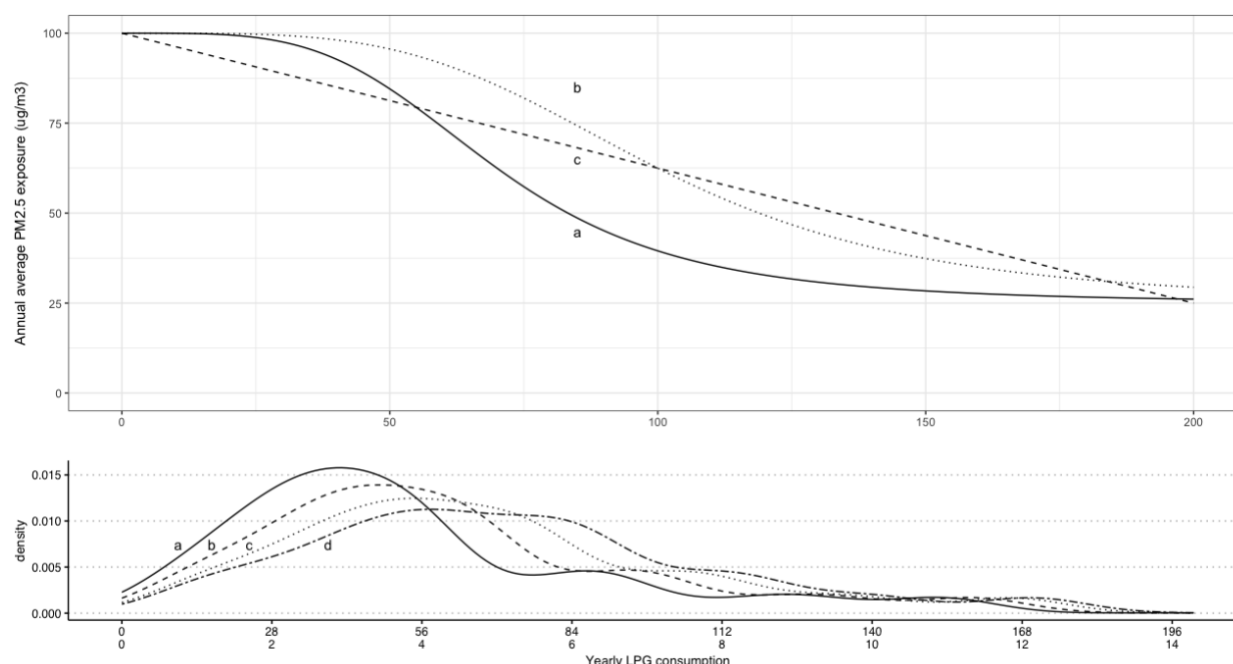

**Figure S8. Illustration of LPG consumption scenario modeling based on price changes and price elasticities (bottom) and the relationship between LPG consumption and average PM2.5 exposures (top).** As described above, we draw on three sets of price elasticities (modeled here as the change in LPG consumption for an increase in LPG refill prices from 550 INR to 1100 INR) where a = 1100 INR, b=900 INR, c=700 INR, and d=550 INR. The densities can be interpreted as the fraction of the population at every kilogram per year LPG consumption. The plot is truncated between 1 and 200 kg/year/household.

### *Other model inputs and parameters*

We use predicted data on the size of India's population and crude mortality rate yearly from 2023–2030. These data are derived from the United Nations World Population Prospects 2022 (available [here](#)) and are shown in Table S4. We note that the UN WPP indicates that India's crude mortality rate will decline from 9.1 per 1000 in 2022 to 6.6 per 1000 in 2023. If the crude mortality rate does not drop to this extent, our results may underestimate mortality damages due to higher-than-expected baseline mortality rates, though ex ante it is difficult to know how this may alter the effect of LPG subsidies on the margin.

Our choice of  $VSL$  (820,000 USD) comes from ref.<sup>13</sup> Additionally, we identified and evaluated VSLs of 330,000 USD<sup>14</sup> and 1.1528 million USD (8).

Given that we are projecting future benefits, it is useful to apply a social discount rate. According to ref.(14) based on growth rates, a discount rate of 9% is appropriate for India in global health analyses.

Our choice of time horizon (2023–2030) is aligned with the Sustainable Development Goals 'deadline' of 2030, though, of course, is somewhat arbitrary. We refrain from predicting beyond 2030 to avoid even larger uncertainties in fuel markets and other policies and political environments.

### Mortality modeling

To estimate mortality damages, we estimate the number of people at each 1 kg/year increment, which is directly mapped to personal PM<sub>2.5</sub> exposure, as outlined above. For a given level of PM<sub>2.5</sub> exposure, we use the GEMM to identify the mortality hazard ratio for that kg/year population group. Applying this hazard ratio to the national crude mortality rate, we then

estimate excess mortality relative to ‘theoretical minimum’ 2.4 ug/m<sup>3</sup>. We then sum yearly excess mortality due to PM<sub>2.5</sub> exposure within a year and estimate differences across scenarios within a year. We then apply VSLs (preferred, high, low), apply the social discount factor, and summarize across various model parameters: price, price sensitivities, and LPG consumption to PM<sub>2.5</sub> exposure mapping. These results are summarized in Table S5.

**Table S4: India socio-demographic, mortality, and cooking fuel inputs, 2023–2030.**

| Year | CMR per 1,000 people | Pop. (millions) | PMUY fraction <sup>a</sup> |
|------|----------------------|-----------------|----------------------------|
| 2023 | 9.45                 | 1436.51         | 0.362                      |
| 2024 | 9.22                 | 1449.46         | 0.359                      |
| 2025 | 8.99                 | 1462.17         | 0.356                      |
| 2026 | 8.77                 | 1474.51         | 0.353                      |
| 2027 | 8.54                 | 1486.78         | 0.350                      |
| 2028 | 8.31                 | 1498.67         | 0.347                      |
| 2029 | 8.08                 | 1503            | 0.346                      |
| 2030 | 7.85                 | 1514            | 0.344                      |

CMR = Crude Mortality Rate; Pop. = Population

<sup>a</sup> Assumes a fixed population of PMUY beneficiaries of 96 million households. With population growth, this fraction declines between 2023-2030.



**Table S5. Modeled results of mortality-related changes related to increases in LPG cylinder refill costs.**

|                                         | 550 (N=1000)           | 700 (N=1000)          | 900 (N=1000)                      |
|-----------------------------------------|------------------------|-----------------------|-----------------------------------|
| Elasticity 1                            |                        |                       |                                   |
| Mean (SD)                               | 0.33 (0.03)            | 0.33 (0.02)           | 0.33 (0.02)                       |
| Median (IQR)                            | 0.33 (0.31, 0.35)      | 0.33 (0.31, 0.35)     | 0.33 (0.31, 0.35)                 |
| Range                                   | 0.24 - 0.41            | 0.25 - 0.41           | 0.26 - 0.43                       |
| Elasticity 2                            |                        |                       |                                   |
| Mean (SD)                               | 0.20 (0.02)            | 0.20 (0.02)           | 0.20 (0.03)                       |
| Median (IQR)                            | 0.20 (0.18, 0.22)      | 0.20 (0.18, 0.22)     | 0.20 (0.18, 0.22)                 |
| Range                                   | 0.11 - 0.27            | 0.10 - 0.30           | 0.12 - 0.28                       |
| Elasticity 3                            |                        |                       |                                   |
| Mean (SD)                               | 0.10 (0.00)            | 0.10 (0.00)           | 0.10 (0.00)                       |
| Median (IQR)                            | 0.10 (0.10, 0.10)      | 0.10 (0.10, 0.10)     | 0.10 (0.10, 0.10)                 |
| Range                                   | 0.09 - 0.11            | 0.09 - 0.11           | 0.09 - 0.11                       |
| Annual Average                          |                        |                       |                                   |
| PM2.5 Exposure 1                        |                        |                       |                                   |
| Mean (SD)                               | 51.32 (3.77)           | 51.32 (3.77)          | 51.32 (3.77)                      |
| Median (IQR)                            | 51.19 (48.81, 53.86)   | 51.19 (48.81, 53.86)  | 51.19 (48.81, 53.86)              |
| Range                                   | 39.40 - 67.24          | 39.40 - 67.24         | 39.40 - 67.24                     |
| Annual Average                          |                        |                       |                                   |
| PM2.5 Exposure 2                        |                        |                       |                                   |
| Mean (SD)                               | 62.77 (5.09)           | 62.77 (5.09)          | 62.77 (5.09)                      |
| Median (IQR)                            | 62.57 (59.30, 66.42)   | 62.58 (59.30, 66.43)  | 62.58 (59.30, 66.43)              |
| Range                                   | 46.15 - 80.44          | 46.15 - 80.44         | 46.15 - 80.44                     |
| Annual Average                          |                        |                       |                                   |
| PM2.5 Exposure 3                        |                        |                       |                                   |
| Mean (SD)                               | 60.03 (3.56)           | 60.03 (3.57)          | 60.03 (3.57)                      |
| Median (IQR)                            | 60.05 (57.59, 62.43)   | 60.05 (57.58, 62.44)  | 60.05 (57.58, 62.44)              |
| Range                                   | 47.90 - 74.20          | 47.90 - 74.20         | 47.90 - 74.20                     |
| PM2.5 – LPG Scenario 1                  |                        |                       |                                   |
| Elasticity 1                            |                        |                       |                                   |
| Averted mortalities                     |                        |                       |                                   |
| Mean (SD)                               | 912276.62 (115659.11)  | 638886.70 (82027.79)  | 295285.77 (40168.91)              |
|                                         | 902530.19 (832431.00,  | 636878.55 (580967.27, |                                   |
| Median (IQR)                            | 990446.48)             | 694300.60)            | 294108.27 (268630.51, 321152.16)  |
| Range                                   | 592323.59 - 1408795.42 | 408806.99 - 935050.42 | 179481.55 - 441338.86             |
| Value of Averted mortalities, \$        |                        |                       |                                   |
| Mean (SD)                               | 438474800510.31        | 307073219669.03       |                                   |
|                                         | (55590161926.18)       | (39425674140.71)      |                                   |
|                                         | 433790294989.08        | 306108026344.43       | 141925557750.33 (19306702096.83)  |
|                                         | (400097963893.53,      | (279234939528.00,     |                                   |
| Median (IQR)                            | 476046201891.56)       | 333707245764.07)      | 141359606498.75 (129114028963.64, |
|                                         | 284693218248.65        | 196488168187.28       | 154357929989.63)                  |
| Range                                   | 677120599735.38        | 449420752256.50       | 86265649695.57 - 212124220969.57  |
| Value of Averted mortalities, \$ (low)  |                        |                       |                                   |
| Mean (SD)                               | 226088569013.13        | 158334628891.84       |                                   |
|                                         | (28663677243.19)       | (20328863228.80)      |                                   |
|                                         | 223673120853.74        | 157836951083.84       | 73180365715.02 (9955018268.68)    |
|                                         | (206300512632.60,      | (143980515694.12,     |                                   |
| Median (IQR)                            | 245461322850.34)       | 172067798597.10)      | 7288547100.92 (66574421184.38,    |
|                                         | 146794940659.46        | 101314211721.57       | 79590807650.90)                   |
| Range                                   | 349140309238.55        | 231732575382.26       | 44480725624.28 - 109376551437.43  |
| Value of Averted mortalities, \$ (high) |                        |                       |                                   |
| Mean (SD)                               | 789802734419.20        | 553115636928.84       |                                   |
|                                         | (100131779169.53)      | (71015495545.96)      |                                   |
|                                         | 781364768849.08        | 551377082452.90       | 255643410897.79 (34776197151.92)  |
|                                         | (720676457463.22,      | (502971934824.80,     |                                   |
| Median (IQR)                            | 857478221157.18)       | 601090176432.54)      | 254623991205.88 (232566644670.77, |
|                                         | 512803659370.37        | 353924312947.34       | 278037221393.82)                  |
| Range                                   | 1219663480273.35       | 809519130002.03       | 155386001514.14 - 382088753021.44 |
| Elasticity 2                            |                        |                       |                                   |
| Averted mortalities                     |                        |                       |                                   |
| Mean (SD)                               | 467404.12 (75515.66)   | 302824.23 (52804.33)  | 127396.01 (27004.88)              |

|                                         |                       |                       |                                  |
|-----------------------------------------|-----------------------|-----------------------|----------------------------------|
|                                         | 463194.44 (414633.31, | 299607.54 (264792.43, |                                  |
| Median (IQR)                            | 514912.31)            | 338360.54)            | 126412.94 (108149.31, 145981.53) |
| Range                                   | 235845.28 - 755022.68 | 133041.06 - 506939.76 | 44299.48 - 219618.80             |
| Value of Averted mortalities, \$        |                       |                       |                                  |
|                                         | 224652174031.08       | 145548827859.54       |                                  |
| Mean (SD)                               | (36295697138.93)      | (25379766358.27)      | 61231363031.41 (12979569065.69)  |
|                                         | 222628842217.55       | 144002766686.90       |                                  |
| Median (IQR)                            | (199288521156.63,     | (127269299634.84,     | 60758860592.47 (51980666882.05,  |
|                                         | 247486418157.88)      | 162628927617.10)      | 70164270722.27)                  |
| Range                                   | 113356201258.30 -     | 63944587946.52 -      |                                  |
| Value of Averted mortalities, \$ (low)  | 362892581155.71       | 243654506280.69       | 21292015139.01 - 105557138362.41 |
|                                         | 115836277234.78       | 75048614365.07        |                                  |
| Mean (SD)                               | (18714968837.26)      | (13086442028.48)      | 31572421563.07 (6692590299.50)   |
|                                         | 114792996768.43       | 74251426572.94        |                                  |
| Median (IQR)                            | (102758143721.39,     | (65623232624.21,      | 31328787492.99 (26802531361.06,  |
|                                         | 127610184362.66)      | 83855540802.57)       | 36178452091.17)                  |
| Range                                   | 58449291273.81 -      | 32971428159.92 -      |                                  |
| Value of Averted mortalities, \$ (high) | 187116487158.41       | 125634354800.98       | 10978695306.05 - 54427899468.12  |
|                                         | 404654728473.48       | 262169826182.00       |                                  |
| Mean (SD)                               | (65377624471.50)      | (45715304152.83)      | 110292992660.32 (23379448779.58) |
|                                         | 401010202044.37       | 259384983494.79       |                                  |
| Median (IQR)                            | (358968448733.38,     | (229243825967.26,     | 109441897642.19 (93630176221.30, |
|                                         | 445784910706.89)      | 292935355870.31)      | 126383392638.48)                 |
| Range                                   | 204182857516.51 -     | 115180189038.67 -     |                                  |
|                                         | 653660261806.72       | 438882679438.09       | 38352242269.14 - 190134795475.28 |
| Elasticity 3                            |                       |                       |                                  |
| Averted mortalities                     |                       |                       |                                  |
| Mean (SD)                               | 394068.79 (47581.96)  | 271125.36 (33375.70)  | 125955.26 (17150.39)             |
|                                         | 391314.37 (360611.59, | 270957.79 (248065.75, |                                  |
| Median (IQR)                            | 425527.97)            | 293493.87)            | 125215.24 (114960.51, 137472.83) |
| Range                                   | 257087.31 - 579864.85 | 174884.35 - 384842.95 | 74731.25 - 185710.36             |
| Value of Averted mortalities, \$        |                       |                       |                                  |
|                                         | 189404432660.77       | 130313148156.33       |                                  |
| Mean (SD)                               | (22869698685.81)      | (16041627104.92)      | 60538882783.52 (8243130979.52)   |
|                                         | 188080551426.52       | 130232608522.91       |                                  |
| Median (IQR)                            | (173323628492.87,     | (119229823909.07,     | 60183198885.84 (55254387174.53,  |
|                                         | 204524909181.84)      | 141064301199.06)      | 66074665534.31)                  |
| Range                                   | 123565926412.58 -     | 84056063864.53 -      |                                  |
| Value of Averted mortalities, \$ (low)  | 278705073647.71       | 184970143533.45       | 35918676011.00 - 89259452489.68  |
|                                         | 97661660590.71        | 67192717018.11        |                                  |
| Mean (SD)                               | (11792188384.87)      | (8271463975.98)       | 31215361435.25 (4250364411.32)   |
|                                         | 96979034329.30        | 67151188769.63        |                                  |
| Median (IQR)                            | (89369995941.64,      | (61477877953.12,      | 31031961925.51 (28490543386.87,  |
|                                         | 105458156296.89)      | 72736280305.77)       | 34069749416.13)                  |
| Range                                   | 63713680806.49 -      | 43341407930.15 -      |                                  |
| Value of Averted mortalities, \$ (high) | 143707303599.60       | 95375230259.43        | 18520567318.17 - 46024405189.99  |
|                                         | 341164734330.21       | 234726558116.59       |                                  |
| Mean (SD)                               | (41194044757.81)      | (28894980822.74)      | 109045662613.81 (14847939676.87) |
|                                         | 338780093257.02       | 234581486101.89       |                                  |
| Median (IQR)                            | (312199185822.78,     | (214762720316.22,     | 108404986993.12 (99526964898.13, |
|                                         | 368400492663.79)      | 254092072534.81)      | 119016991293.67)                 |
| Range                                   | 222573124950.66 -     | 151405985035.99 -     |                                  |
|                                         | 502017513907.93       | 333177471039.62       | 64698515164.81 - 160778588797.03 |

## **Kenya case study**

Our approach to modeling health and climate benefits changes in VAT mirrors that of the India analysis.

### **Data sources**

#### *LPG consumption*

Recent estimates of LPG ownership and use are derived using two data sources. First, the use of LPG as a primary cooking fuel comes from the Demographic Health Survey conducted in 2019, which is nationally-representative. One limitation of this survey is that we lack robust data on the use of secondary cooking fuels (either LPG or biomass). We complement these DHS data with data from Shupler et al. (2021)(15) who conducted 1840 household energy use surveys in Eldoret, Kenya. More specifically, we use data from 757 randomly-sampled households in Eldoret. These data indicate that among LPG users, 4% of households are exclusive LPG users, 37% are primary LPG / secondary biomass, and 59% are primary biomass / secondary LPG. In total, we estimate that 31.2% of households in Kenya use LPG in some capacity.

Shupler et al. (2021) also report kilograms of LPG consumed per capita per year across the different LPG use types. We simulate normal distributions of LPG kg/capita/year across the different household samples to generate hypothetical populations to recover the ‘raw’ data from this study. By combining these distributions with data on the number of households in Kenya, we can recover distributions of LPG consumption (kg/capita/year) for all Kenyan households.

#### *LPG prices*

We model three central scenarios: no VAT, VAT of 8%, and VAT of 16% (reference). We estimate the percent change based on the removal (or reduction) of the VAT relative to current

prices, assuming that the 16% VAT. Based on a reference price of \$1.73/kg, which internalizes the 16% VAT, the price reduction in percentage terms would be 14%. For the 8% VAT scenario, the price reduction is 7%. This agrees with observational evidence from Shupler et al. (2023) (16).

### *LPG price elasticity*

To estimate the extent to which LPG consumption declines with increases in refill prices, we draw on recent work by Shupler et al. (2023), who observed LPG consumption records among a subset of households that use pay-as-you go technologies. Using real-time data on LPG prices and consumption before and after the VAT was re-established, they estimate a change in LPG consumption with a change in price. Specifically, Shupler et al. (2023) report that LPG prices increased by 34 Kenyan Shillings (KSh) from 180 to 214 KSh, which was accompanied by a decline in LPG consumption of 0.11 kg/capita/month (from 0.91 kg/capita/month). We thus estimate that a price increase of 19% resulted in an LPG consumption decline of 12%. Using these percent changes, we recover a price elasticity of 0.64. Elsewhere, Shupler and colleagues report that wealthier households (and higher consuming households) were less likely to alter LPG consumption as a result of the VAT changes (17). We model price elasticity differently across consumption groups, where those that are highest consumers have the lowest elasticity and vice-versa. We again draw randomly from a distribution in each bootstrap run. R code is as follows:

```
elastic3 = 0.6399481/10 # >30 kg/capita/yr
elastic2 = 0.6399481 # 15-30 kg/capita/yr
elastic1 = 0.6399481*1.1 # <15 kg/capita/yr
```

```
elasticity1 = rnorm(1, elastic 1, .025)
elasticity2 = rnormTrunc(1, elastic2, .5, 0.1, elasticity1)
elasticity3 = rnormTrunc(1, elastic3, .0025, 0.01, elasticity2)
```

### *PM<sub>2.5</sub> exposures*

Recent, nationally representative personal air pollution exposure measurements for households that use exclusively polluting cooking fuels, that mix polluting and clean-burning fuels, and that use exclusively clean-burning fuels in Kenya are not available. Instead, we draw on a set of other studies to establish baselines for these categories.

Drawing on the PURE cohort study, Shupler et al. (2020)(18) establish average PM<sub>2.5</sub> exposures (medians and 25<sup>th</sup>-75<sup>th</sup> percentiles) for households in Eastern Sub-Saharan Africa as follows. They estimate relatively high levels of exposure (in  $\mu\text{gm}^{-3}$ ): among gas/electric users, median female, male, and child exposures (25<sup>th</sup>, 75<sup>th</sup> percentiles) are 102 (34, 314), 73 (24, 226), and 89 (30, 273), respectively, indicating that clean fuel uses in these categories may not be exclusively using these fuels. For wood users, median female, male, and child exposures (25<sup>th</sup>, 75<sup>th</sup> percentiles) are 388 (115, 1122), 279 (83, 808), and 337 (100, 976), respectively.

Elsewhere, a study in Kenya focused on predicting personal exposures (Johnson et al. (2021)(19)) reports lower estimated predicted and measured exposures among LPG users and wood users (in  $\mu\text{g}/\text{m}^3$ ): median (25<sup>th</sup>, 75<sup>th</sup> percentile) exposures of 29 (27-46); for wood users, they measured 182 (104, 292).

Using these inputs, we assign average PM<sub>2.5</sub> exposure for exclusive LPG use to be roughly 35  $\mu\text{gm}^{-3}$ . Average PM<sub>2.5</sub> exposure for exclusive biomass use is 250  $\mu\text{gm}^{-3}$ . Both of these estimates are perhaps optimistic and ultimately may mean we underestimate impacts. If we halve the exclusive biomass value in our models to 125  $\mu\text{g}/\text{m}^3$ , modeled mortality impacts are attenuated by 10-15% (see Table S7 for halved results)

As with the India model, we develop three scenarios to relate LPG consumption to average PM<sub>2.5</sub> exposures. For each of these models we develop a simple formula with

parameters that we randomly draw from in each bootstrapped run, so the LPG to PM2.5 exposure relationship varies slightly across all runs. In each run, we model all three LPG-PM2.5 relationships fully. The central responses are shown in Figure S9 and include:

- (a) Our preferred, sinusoidal response.
- (b) A somewhat more pessimistic sinusoidal response.
- (c) A linear response from the maximum exposure (1 kg) to the minimum (55 kg).

In each bootstrap we run all three scenarios and perturb their parameters somewhat (slightly higher/lower max/min, earlier/later, steeper/shallower declines). Specific R code to do so is shown below:

```
min1 = rnorm(1, 35, 5)
max1 = rnorm(1, 250, 25)
decline1 = rnorm(1, 18, 2.5)
decline2 = rnorm(1, 13, 2.5)
exp1 = rnorm(1, 3, .05)
exp2 = rnorm(1, 5, .1)

x=1:55
PM25_1=min1 + (max1-min1) / (1 + (x/decline1)^exp1)
PM25_2=min1 + (max1-min1) / (1 + (x/decline2)^exp1)
PM25_3=max1 - ((max1 - min1) / max(x))*x

kg_lpg_pm25 <- tibble(
  kg_lpg = 1:55,
  PM25_1 = PM25_1,
  PM25_2 = PM25_2,
  PM25_3 = PM25_3
)
```

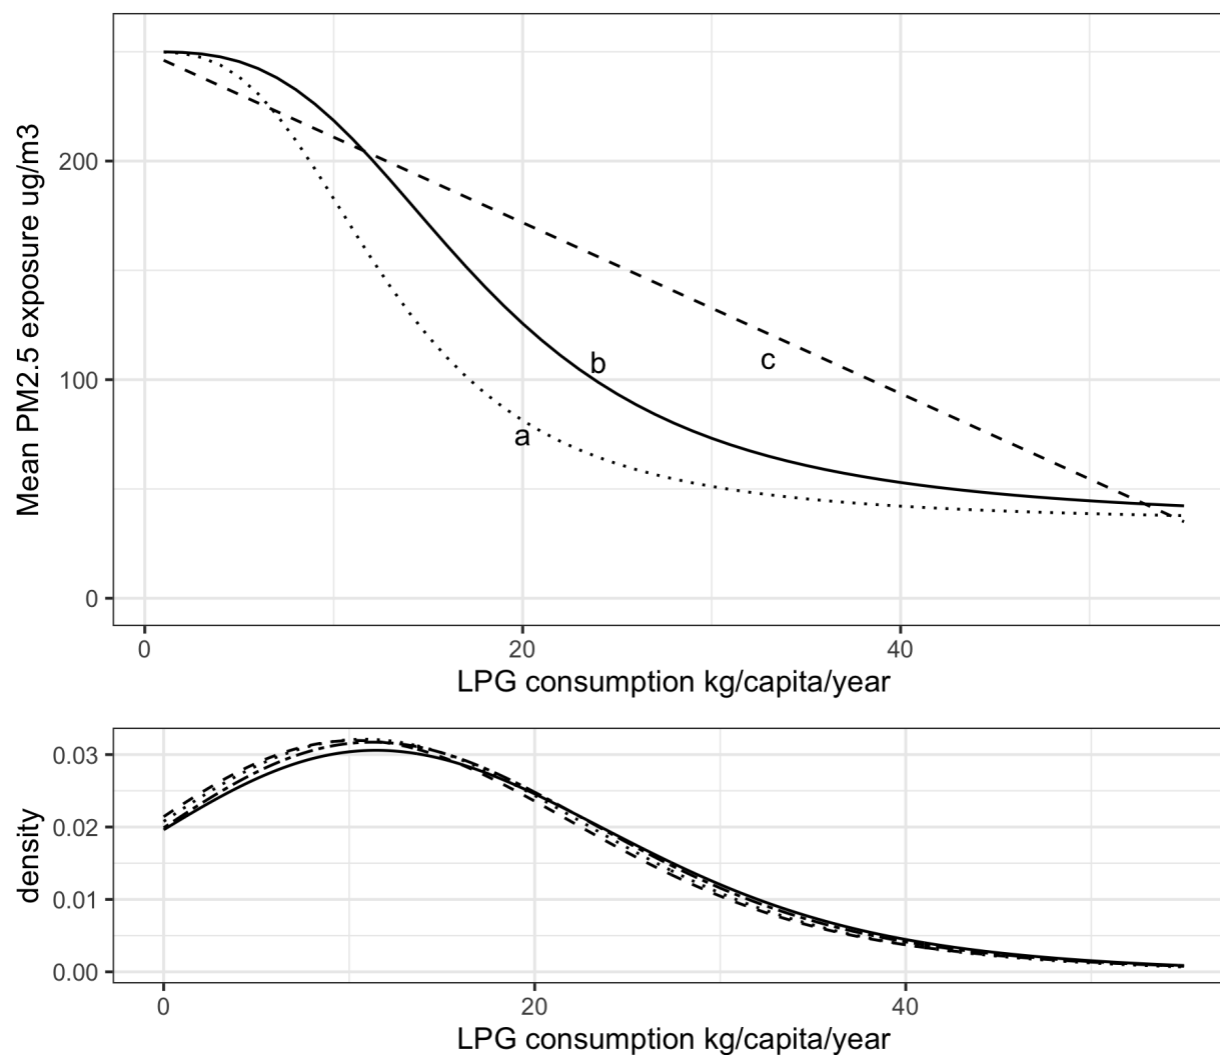

**Figure S9. Illustration of LPG consumption scenario modeling based on price changes and price elasticities (bottom) and the relationship between LPG consumption and average PM2.5 exposures (top) in Kenya.** As described in the SM above we draw on three sets of price elasticities (modeled here is the change in LPG consumption for a 16% increase in LPG refill).



### *Other model inputs and parameters*

We use predicted data on the size of Kenya's population and crude mortality rate yearly from 2023–2030. These data are derived from the United Nations World Population Prospects 2022 (available [here](#)).

Our choice of VSL (230,000 USD) comes from ref (20). In the absence of other clear estimates, we model a low and high VSL at 66% and 133% of 230,000 USD, respectively.

We apply a social discount rate; according to Haacker et al. (2019)(14) a discount rate of 5% is appropriate for low- and middle-income countries in global health analyses.

### Mortality modeling

As in the India model, to estimate mortality damages, we estimate the number of people at each 1 kg/capita/year increment, which is directly mapped to personal PM<sub>2.5</sub> exposure, as outlined above. For a given level of PM<sub>2.5</sub> exposure, we use the GEMM to identify the mortality hazard ratio for that kg/capita/year increment population group. Applying this hazard ratio to the national crude mortality rate, we then estimate excess mortality relative to the 'theoretical minimum' 2.4 µgm<sup>-3</sup>. We then sum yearly excess mortality due to PM<sub>2.5</sub> exposure within a year and estimate differences across scenarios within a year. We then apply VSLs (preferred, high, low), apply the social discount rate, and summarize across various model parameters: price change, price elasticities, and LPG consumption to PM<sub>2.5</sub> exposure mapping. These results are summarized in Table S6.

**Table S6. Mortality modeling results for Kenya.**

|                                                 | VAT 8% (N=1000)                     | VAT 16% (N=1000)                    |
|-------------------------------------------------|-------------------------------------|-------------------------------------|
| <b>Annual PM2.5 Exposure, PM2.5-LPG Model a</b> |                                     |                                     |
| Mean (SD)                                       | 89 (13)                             | 89 (14)                             |
| Median (IQR)                                    | 89 (80, 98)                         | 88 (79, 98)                         |
| Range                                           | 49 - 132                            | 47 - 135                            |
| <b>Annual PM2.5 Exposure, PM2.5-LPG Model b</b> |                                     |                                     |
| Mean (SD)                                       | 122 (15)                            | 123 (15)                            |
| Median (IQR)                                    | 122 (113, 131)                      | 122 (112, 132)                      |
| Range                                           | 86 - 178                            | 82 - 165                            |
| <b>Annual PM2.5 Exposure, PM2.5-LPG Model c</b> |                                     |                                     |
| Mean (SD)                                       | 105 (9)                             | 105 (9)                             |
| Median (IQR)                                    | 105 (99, 111)                       | 105 (99, 111)                       |
| Range                                           | 78 - 137                            | 74 - 158                            |
| <b>PM2.5-LPG Model a</b>                        |                                     |                                     |
| <b>Averted mortalities, elasticity 1</b>        |                                     |                                     |
| Mean (SD)                                       | 11207 (2692)                        | 17983 (3273)                        |
| Median (IQR)                                    | 10818 (9406, 12810)                 | 18009 (15755, 20186)                |
| Range                                           | 4944 - 21937                        | -103 - 30089                        |
| <b>Value of Averted Mortalities, \$</b>         |                                     |                                     |
| Mean (SD)                                       | 2083335016 (499803307)              | 3394524256 (611992496)              |
| Median (IQR)                                    | 2014570888 (1751051476, 2384059721) | 3398879349 (2977337894, 3803614648) |
| Range                                           | 917067481 - 4075944581              | -20022776 - 5638023381              |
| <b>Value of Averted Mortalities, \$ (low)</b>   |                                     |                                     |
| Mean (SD)                                       | 1388890011 (333202204)              | 2263016171 (407994997)              |
| Median (IQR)                                    | 1343047259 (1167367651, 1589373147) | 2265919566 (1984891929, 2535743098) |
| Range                                           | 611378321 - 2717296387              | -13348517 - 3758682254              |
| <b>Value of Averted Mortalities, \$ (high)</b>  |                                     |                                     |
| Mean (SD)                                       | 2777780021 (666404409)              | 4526032342 (815989995)              |
| Median (IQR)                                    | 2686094517 (2334735301, 3178746295) | 4531839132 (3969783859, 5071486197) |
| Range                                           | 1222756642 - 5434592775             | -26697034 - 7517364509              |
| <b>Averted mortalities, elasticity 2</b>        |                                     |                                     |
| Mean (SD)                                       | 5421 (1338)                         | 9898 (2216)                         |
| Median (IQR)                                    | 5254 (4456, 6187)                   | 9637 (8417, 11199)                  |
| Range                                           | 2300 - 11445                        | -7269 - 17547                       |
| <b>Value of Averted Mortalities, \$</b>         |                                     |                                     |
| Mean (SD)                                       | 1008072370 (249382962)              | 1875688262 (419534601)              |
| Median (IQR)                                    | 977530687 (829726177, 1151674341)   | 1827423424 (1595013209, 2120098178) |
| Range                                           | 425515779 - 2131954148              | -1412777979 - 3317829455            |
| <b>Value of Averted Mortalities, \$ (low)</b>   |                                     |                                     |
| Mean (SD)                                       | 672048247 (166255308)               | 1250458841 (279689734)              |
| Median (IQR)                                    | 651687124 (553150785, 767782894)    | 1218282283 (1063342140, 1413398785) |
| Range                                           | 283677186 - 1421302765              | -941851986 - 2211886303             |
| <b>Value of Averted Mortalities, \$ (high)</b>  |                                     |                                     |
| Mean (SD)                                       | 1344096494 (332510616)              | 2500917682 (559379468)              |
| Median (IQR)                                    | 1303374249 (1106301569, 1535565788) | 2436564566 (2126684279, 2826797571) |
| Range                                           | 567354371 - 2842605530              | -1883703972 - 4423772607            |
| <b>Averted mortalities, elasticity 3</b>        |                                     |                                     |
| Mean (SD)                                       | 6837 (595)                          | 12478 (1052)                        |
| Median (IQR)                                    | 6819 (6428, 7216)                   | 12431 (11816, 13147)                |
| Range                                           | 5206 - 9342                         | 5290 - 16185                        |
| <b>Value of Averted Mortalities, \$</b>         |                                     |                                     |
| Mean (SD)                                       | 1270054563 (112305011)              | 2362794523 (200555313)              |
| Median (IQR)                                    | 1266960616 (1192163862, 1341597543) | 2352728261 (2235611797, 2489541877) |
| Range                                           | 963404733 - 1744733705              | 1028147220 - 3066172089             |
| <b>Value of Averted Mortalities, \$ (low)</b>   |                                     |                                     |
| Mean (SD)                                       | 846703042 (74870007)                | 1575196349 (133703542)              |
| Median (IQR)                                    | 844640411 (794775908, 894398362)    | 1568485507 (1490407865, 1659694584) |
| Range                                           | 642269822 - 1163155804              | 685431480 - 2044114726              |
| <b>Value of Averted Mortalities, \$ (high)</b>  |                                     |                                     |
| Mean (SD)                                       | 1693406085 (149740015)              | 3150392698 (267407084)              |
| Median (IQR)                                    | 1689280821 (1589551816, 1788796724) | 3136971014 (2980815730, 3319389169) |
| Range                                           | 1284539644 - 2326311607             | 1370862960 - 4088229452             |
| <b>PM2.5-LPG Model b</b>                        |                                     |                                     |
| <b>Model b: Averted Mortalities</b>             |                                     |                                     |

|                                                | VAT 8% (N=1000)                     | VAT 16% (N=1000)                    |
|------------------------------------------------|-------------------------------------|-------------------------------------|
| Mean (SD)                                      | 10773 (2538)                        | 17064 (3085)                        |
| Median (IQR)                                   | 10493 (9016, 12263)                 | 16970 (15023, 19126)                |
| Range                                          | 4779 - 21115                        | -6133 - 29131                       |
| <b>Value of Averted Mortalities, \$</b>        |                                     |                                     |
| Mean (SD)                                      | 1999190971 (470078303)              | 3216480238 (576143994)              |
| Median (IQR)                                   | 1946112142 (1675202053, 2275569648) | 3200597020 (2838270566, 3607373427) |
| Range                                          | 884585734 - 3916872717              | -1191985944 - 5452440979            |
| <b>Value of Averted Mortalities, \$ (low)</b>  |                                     |                                     |
| Mean (SD)                                      | 1332793981 (313385535)              | 2144320158 (384095996)              |
| Median (IQR)                                   | 1297408095 (1116801369, 1517046432) | 2133731347 (1892180378, 2404915618) |
| Range                                          | 589723823 - 2611248478              | -794657296 - 3634960652             |
| <b>Value of Averted Mortalities, \$ (high)</b> |                                     |                                     |
| Mean (SD)                                      | 2665587962 (626771070)              | 4288640317 (768191992)              |
| Median (IQR)                                   | 2594816190 (2233602738, 3034092864) | 4267462694 (3784360755, 4809831236) |
| Range                                          | 1179447645 - 5222496955             | -1589314592 - 7269921305            |
| <b>Averted mortalities, elasticity 2</b>       |                                     |                                     |
| Mean (SD)                                      | 5494 (1242)                         | 9897 (2089)                         |
| Median (IQR)                                   | 5388 (4606, 6246)                   | 9701 (8612, 11097)                  |
| Range                                          | 2313 - 11165                        | -11813 - 16915                      |
| <b>Value of Averted Mortalities, \$</b>        |                                     |                                     |
| Mean (SD)                                      | 1022087299 (231047925)              | 1875419970 (395369402)              |
| Median (IQR)                                   | 1003537534 (856850763, 1160173063)  | 1841850590 (1635035515, 2100809822) |
| Range                                          | 428078062 - 2074699167              | -2296099946 - 3194737048            |
| <b>Value of Averted Mortalities, \$ (low)</b>  |                                     |                                     |
| Mean (SD)                                      | 681391532 (154031950)               | 1250279980 (263579601)              |
| Median (IQR)                                   | 669025023 (571233842, 773448709)    | 1227900393 (1090023677, 1400539881) |
| Range                                          | 285385375 - 1383132778              | -1530733297 - 2129824699            |
| <b>Value of Averted Mortalities, \$ (high)</b> |                                     |                                     |
| Mean (SD)                                      | 1362783065 (308063900)              | 2500559960 (527159203)              |
| Median (IQR)                                   | 1338050045 (1142467684, 1546897417) | 2455800786 (2180047353, 2801079763) |
| Range                                          | 570770749 - 2766265556              | -3061466595 - 4259649398            |
| <b>Averted mortalities, elasticity 3</b>       |                                     |                                     |
| Mean (SD)                                      | 6996 (675)                          | 12557 (1270)                        |
| Median (IQR)                                   | 6964 (6536, 7427)                   | 12519 (11718, 13309)                |
| Range                                          | 5198 - 9856                         | -1307 - 16480                       |
| <b>Value of Averted Mortalities, \$</b>        |                                     |                                     |
| Mean (SD)                                      | 1300926747 (128121373)              | 2378039797 (243020653)              |
| Median (IQR)                                   | 1295363409 (1213633747, 1382285792) | 2373492848 (2217708859, 2520877093) |
| Range                                          | 954147338 - 1844184459              | -254028441 - 3129334293             |
| <b>Value of Averted Mortalities, \$ (low)</b>  |                                     |                                     |
| Mean (SD)                                      | 867284498 (85414249)                | 1585359864 (162013769)              |
| Median (IQR)                                   | 863575606 (809089165, 921523861)    | 1582328566 (1478472573, 1680584728) |
| Range                                          | 636098225 - 1229456306              | -169352294 - 2086222862             |
| <b>Value of Averted Mortalities, \$ (high)</b> |                                     |                                     |
| Mean (SD)                                      | 1734568996 (170828497)              | 3170719729 (324027537)              |
| Median (IQR)                                   | 1727151212 (1618178329, 1843047722) | 3164657131 (2956945145, 3361169457) |
| Range                                          | 1272196451 - 2458912612             | -338704588 - 4172445724             |
| <b>PM2.5 – LPG Model c</b>                     |                                     |                                     |
| <b>Averted Mortalities</b>                     |                                     |                                     |
| Mean (SD)                                      | 4223 (2269)                         | 4952 (2445)                         |
| Median (IQR)                                   | 3721 (2582, 5346)                   | 4473 (3296, 6181)                   |
| Range                                          | 464 - 16502                         | -12191 - 16516                      |
| <b>Value of Averted Mortalities, \$</b>        |                                     |                                     |
| Mean (SD)                                      | 730675178 (418265090)               | 870596101 (451218741)               |
| Median (IQR)                                   | 634166396 (428118199, 940584580)    | 781402921 (564030682, 1098765422)   |
| Range                                          | 49992091 - 3016810761               | -2369525751 - 3014839641            |
| <b>Value of Averted Mortalities, \$ (low)</b>  |                                     |                                     |
| Mean (SD)                                      | 487116785 (278843394)               | 580397401 (300812494)               |
| Median (IQR)                                   | 422777597 (285412133, 627056386)    | 520935281 (376020455, 732510281)    |
| Range                                          | 33328061 - 2011207174               | -1579683834 - 2009893094            |
| <b>Value of Averted Mortalities, \$ (high)</b> |                                     |                                     |
| Mean (SD)                                      | 974233571 (557686787)               | 1160794801 (601624988)              |
| Median (IQR)                                   | 845555194 (570824266, 1254112773)   | 1041870561 (752040910, 1465020562)  |
| Range                                          | 66656122 - 4022414348               | -3159367667 - 4019786188            |
| <b>Averted mortalities, elasticity 2</b>       |                                     |                                     |
| Mean (SD)                                      | 747 (511)                           | 1141 (726)                          |
| Median (IQR)                                   | 638 (391, 989)                      | 1054 (762, 1418)                    |

|                                                | VAT 8% (N=1000)                  | VAT 16% (N=1000)                 |
|------------------------------------------------|----------------------------------|----------------------------------|
| Range                                          | -177 - 3641                      | -13164 - 4581                    |
| <b>Value of Averted Mortalities, \$</b>        |                                  |                                  |
| Mean (SD)                                      | 102673200 (90217899)             | 179529838 (132971394)            |
| Median (IQR)                                   | 83923108 (39704353, 145420606)   | 163559092 (113081328, 229109012) |
| Range                                          | -62242679 - 617387633            | -2558702228 - 803743461          |
| <b>Value of Averted Mortalities, \$ (low)</b>  |                                  |                                  |
| Mean (SD)                                      | 68448800 (60145266)              | 119686559 (88647596)             |
| Median (IQR)                                   | 55948739 (26469569, 96947071)    | 109039394 (75387552, 152739342)  |
| Range                                          | -41495119 - 411591755            | -1705801486 - 535828974          |
| <b>Value of Averted Mortalities, \$ (high)</b> |                                  |                                  |
| Mean (SD)                                      | 136897600 (120290532)            | 239373117 (177295192)            |
| Median (IQR)                                   | 111897478 (52939138, 193894142)  | 218078789 (150775105, 305478683) |
| Range                                          | -82990238 - 823183511            | -3411602971 - 1071657948         |
| <b>Averted mortalities, elasticity 3</b>       |                                  |                                  |
| Mean (SD)                                      | 1144 (307)                       | 1659 (502)                       |
| Median (IQR)                                   | 1138 (944, 1352)                 | 1681 (1435, 1878)                |
| Range                                          | 241 - 2247                       | -10568 - 2869                    |
| <b>Value of Averted Mortalities, \$</b>        |                                  |                                  |
| Mean (SD)                                      | 167340922 (58192622)             | 267217461 (95062062)             |
| Median (IQR)                                   | 167006129 (130461760, 205623982) | 271733930 (225318715, 308566713) |
| Range                                          | -5764676 - 378603920             | -2053994246 - 492714514          |
| <b>Value of Averted Mortalities, \$ (low)</b>  |                                  |                                  |
| Mean (SD)                                      | 111560615 (38795082)             | 178144974 (63374708)             |
| Median (IQR)                                   | 111337419 (86974507, 137082654)  | 181155953 (150212476, 205711142) |
| Range                                          | -3843117 - 252402613             | -1369329498 - 328476342          |
| <b>Value of Averted Mortalities, \$ (high)</b> |                                  |                                  |
| Mean (SD)                                      | 223121229 (77590163)             | 356289948 (126749416)            |
| Median (IQR)                                   | 222674838 (173949013, 274165309) | 362311906 (300424953, 411422284) |
| Range                                          | -7686235 - 504805227             | -2738658995 - 656952685          |

**Table S7. Alternative mortality modeling results for Kenya where biomass exposures are 50% lower.**

|                                                 | VAT 8% (N=1000)                     | VAT 16% (N=1000)                    |
|-------------------------------------------------|-------------------------------------|-------------------------------------|
| <b>Annual PM2.5 Exposure, PM2.5-LPG Model a</b> |                                     |                                     |
| Mean (SD)                                       | 56 (9)                              | 56 (9)                              |
| Median (IQR)                                    | 56 (50, 61)                         | 56 (50, 62)                         |
| Range                                           | 30 - 89                             | 31 - 84                             |
| <b>Annual PM2.5 Exposure, PM2.5-LPG Model b</b> |                                     |                                     |
| Mean (SD)                                       | 70 (11)                             | 70 (11)                             |
| Median (IQR)                                    | 69 (62, 77)                         | 70 (62, 78)                         |
| Range                                           | 37 - 117                            | 33 - 104                            |
| <b>Annual PM2.5 Exposure, PM2.5-LPG Model c</b> |                                     |                                     |
| Mean (SD)                                       | 63 (9)                              | 63 (9)                              |
| Median (IQR)                                    | 62 (57, 69)                         | 63 (57, 69)                         |
| Range                                           | 36 - 95                             | 32 - 88                             |
| <b>PM2.5-LPG Model a</b>                        |                                     |                                     |
| <b>Averted mortalities, elasticity 1</b>        |                                     |                                     |
| Mean (SD)                                       | 10391 (2203)                        | 15448 (2794)                        |
| Median (IQR)                                    | 10256 (8898, 11797)                 | 15610 (13625, 17220)                |
| Range                                           | 2612 - 18665                        | 195 - 24149                         |
| <b>Value of Averted Mortalities, \$</b>         |                                     |                                     |
| Mean (SD)                                       | 1929619801 (408963198)              | 2908036918 (524379426)              |
| Median (IQR)                                    | 1905071899 (1652353371, 2189543395) | 2941266729 (2566964872, 3243146346) |
| Range                                           | 481618911 - 3462395826              | 37965357 - 4526598422               |
| <b>Value of Averted Mortalities, \$ (low)</b>   |                                     |                                     |
| Mean (SD)                                       | 1286413201 (272642132)              | 1938691278 (349586284)              |
| Median (IQR)                                    | 1270047933 (1101568914, 1459695597) | 1960844486 (1711309915, 2162097564) |
| Range                                           | 321079274 - 2308263884              | 25310238 - 3017732281               |
| <b>Value of Averted Mortalities, \$ (high)</b>  |                                     |                                     |
| Mean (SD)                                       | 2572826402 (545284264)              | 3877382557 (699172569)              |
| Median (IQR)                                    | 2540095866 (2203137827, 2919391194) | 3921688971 (3422619830, 4324195128) |
| Range                                           | 642158548 - 4616527768              | 50620475 - 6035464563               |
| <b>Averted mortalities, elasticity 2</b>        |                                     |                                     |
| Mean (SD)                                       | 6101 (1279)                         | 10268 (1974)                        |
| Median (IQR)                                    | 5966 (5213, 6914)                   | 10170 (8911, 11453)                 |
| Range                                           | 2109 - 11757                        | -2276 - 16763                       |
| <b>Value of Averted Mortalities, \$</b>         |                                     |                                     |
| Mean (SD)                                       | 1133841754 (238348971)              | 1941307643 (373347639)              |
| Median (IQR)                                    | 1108717437 (969358776, 1284736397)  | 1922378761 (1683900012, 2168190999) |
| Range                                           | 388567338 - 2185342400              | -442441581 - 3172307724             |
| <b>Value of Averted Mortalities, \$ (low)</b>   |                                     |                                     |
| Mean (SD)                                       | 755894503 (158899314)               | 1294205096 (248898426)              |
| Median (IQR)                                    | 739144958 (646239184, 856490932)    | 1281585841 (1122600008, 1445460666) |
| Range                                           | 259044892 - 1456894933              | -294961054 - 2114871816             |
| <b>Value of Averted Mortalities, \$ (high)</b>  |                                     |                                     |
| Mean (SD)                                       | 1511789005 (317798627)              | 2588410191 (497796852)              |
| Median (IQR)                                    | 1478289916 (1292478367, 1712981863) | 2563171681 (2245200015, 2890921332) |
| Range                                           | 518089784 - 2913789867              | -589922108 - 4229743632             |
| <b>Averted mortalities, elasticity 3</b>        |                                     |                                     |
| Mean (SD)                                       | 7241 (850)                          | 11752 (1560)                        |
| Median (IQR)                                    | 7262 (6782, 7752)                   | 11846 (10844, 12739)                |
| Range                                           | 2291 - 10207                        | 3107 - 15966                        |
| <b>Value of Averted Mortalities, \$</b>         |                                     |                                     |
| Mean (SD)                                       | 1343651471 (158927928)              | 2217232977 (296698613)              |
| Median (IQR)                                    | 1347720319 (1258349087, 1439350664) | 2234357222 (2044221941, 2404844508) |
| Range                                           | 422264540 - 1902093475              | 578768925 - 3022928089              |
| <b>Value of Averted Mortalities, \$ (low)</b>   |                                     |                                     |
| Mean (SD)                                       | 895767647 (105951952)               | 1478155318 (197799075)              |
| Median (IQR)                                    | 898480213 (838899391, 959567109)    | 1489571481 (1362814627, 1603229672) |
| Range                                           | 281509694 - 1268062317              | 385845950 - 2015285393              |
| <b>Value of Averted Mortalities, \$ (high)</b>  |                                     |                                     |
| Mean (SD)                                       | 1791535294 (211903904)              | 2956310636 (395598151)              |
| Median (IQR)                                    | 1796960426 (1677798782, 1919134218) | 2979142962 (2725629254, 3206459344) |
| Range                                           | 563019387 - 2536124633              | 771691900 - 4030570786              |
| <b>PM2.5-LPG Model b</b>                        |                                     |                                     |

|                                                | VAT 8% (N=1000)                     | VAT 16% (N=1000)                    |
|------------------------------------------------|-------------------------------------|-------------------------------------|
| <b>Model b: Averted Mortalities</b>            |                                     |                                     |
| Mean (SD)                                      | 9974 (2119)                         | 14614 (2723)                        |
| Median (IQR)                                   | 9786 (8523, 11296)                  | 14693 (12908, 16293)                |
| Range                                          | 2606 - 18085                        | -9478 - 23214                       |
| <b>Value of Averted Mortalities, \$</b>        |                                     |                                     |
| Mean (SD)                                      | 1848798818 (392597885)              | 2746609912 (510922546)              |
| Median (IQR)                                   | 1813920276 (1582200156, 2092438598) | 2764021091 (2429163765, 3056246180) |
| Range                                          | 480433274 - 3350012297              | -1842288281 - 4330566515            |
| <b>Value of Averted Mortalities, \$ (low)</b>  |                                     |                                     |
| Mean (SD)                                      | 1232532545 (261731924)              | 1831073275 (340615031)              |
| Median (IQR)                                   | 1209280184 (1054800104, 1394959065) | 1842680727 (1619442510, 2037497453) |
| Range                                          | 320288849 - 2233341531              | -1228192187 - 2887044343            |
| <b>Value of Averted Mortalities, \$ (high)</b> |                                     |                                     |
| Mean (SD)                                      | 2465065091 (523463847)              | 3662146549 (681230062)              |
| Median (IQR)                                   | 2418560368 (2109600208, 2789918130) | 3685361455 (3238885020, 4074994906) |
| Range                                          | 640577698 - 4466683063              | -2456384374 - 5774088686            |
| <b>Averted mortalities, elasticity 2</b>       |                                     |                                     |
| Mean (SD)                                      | 5985 (1202)                         | 9960 (1914)                         |
| Median (IQR)                                   | 5871 (5158, 6700)                   | 9883 (8698, 11091)                  |
| Range                                          | 2132 - 11376                        | -9299 - 16509                       |
| <b>Value of Averted Mortalities, \$</b>        |                                     |                                     |
| Mean (SD)                                      | 1111350818 (223718561)              | 1881514016 (362252052)              |
| Median (IQR)                                   | 1088580378 (957621576, 1243983380)  | 1865855115 (1644405274, 2095621707) |
| Range                                          | 393045988 - 2111575509              | -1807502211 - 3123227557            |
| <b>Value of Averted Mortalities, \$ (low)</b>  |                                     |                                     |
| Mean (SD)                                      | 740900545 (149145708)               | 1254342678 (241501368)              |
| Median (IQR)                                   | 725720252 (638414384, 829322253)    | 1243903410 (1096270182, 1397081138) |
| Range                                          | 262030659 - 1407717006              | -1205001474 - 2082151705            |
| <b>Value of Averted Mortalities, \$ (high)</b> |                                     |                                     |
| Mean (SD)                                      | 1481801090 (298291415)              | 2508685355 (483002736)              |
| Median (IQR)                                   | 1451440504 (1276828767, 1658644507) | 2487806820 (2192540365, 2794162276) |
| Range                                          | 524061318 - 2815434011              | -2410002948 - 4164303409            |
| <b>Averted mortalities, elasticity 3</b>       |                                     |                                     |
| Mean (SD)                                      | 7168 (876)                          | 11482 (1696)                        |
| Median (IQR)                                   | 7172 (6677, 7693)                   | 11530 (10547, 12486)                |
| Range                                          | 2254 - 10333                        | -7683 - 15838                       |
| <b>Value of Averted Mortalities, \$</b>        |                                     |                                     |
| Mean (SD)                                      | 1329502605 (164360085)              | 2164913376 (323241080)              |
| Median (IQR)                                   | 1330712709 (1238361270, 1428178094) | 2175552983 (1985760584, 2354308878) |
| Range                                          | 415578833 - 1926560350              | -1493426091 - 2994190018            |
| <b>Value of Averted Mortalities, \$ (low)</b>  |                                     |                                     |
| Mean (SD)                                      | 886335070 (109573390)               | 1443275584 (215494053)              |
| Median (IQR)                                   | 887141806 (825574180, 952118729)    | 1450368655 (1323840389, 1569539252) |
| Range                                          | 277052555 - 1284373567              | -995617394 - 1996126678             |
| <b>Value of Averted Mortalities, \$ (high)</b> |                                     |                                     |
| Mean (SD)                                      | 1772670140 (219146780)              | 2886551168 (430988107)              |
| Median (IQR)                                   | 1774283612 (1651148359, 1904237458) | 2900737311 (2647680778, 3139078504) |
| Range                                          | 554105111 - 2568747134              | -1991234788 - 3992253357            |
| <b>PM2.5 – LPG Model c</b>                     |                                     |                                     |
| <b>Averted Mortalities</b>                     |                                     |                                     |
| Mean (SD)                                      | 5117 (1882)                         | 5670 (2014)                         |
| Median (IQR)                                   | 4803 (3833, 6105)                   | 5413 (4306, 6827)                   |
| Range                                          | 1275 - 13974                        | -10186 - 15067                      |
| <b>Value of Averted Mortalities, \$</b>        |                                     |                                     |
| Mean (SD)                                      | 908027286 (347864073)               | 1014218636 (372600513)              |
| Median (IQR)                                   | 848062152 (671052920, 1093697891)   | 966257322 (763778676, 1228751947)   |
| Range                                          | 200320847 - 2552916778              | -1979867675 - 2752534370            |
| <b>Value of Averted Mortalities, \$ (low)</b>  |                                     |                                     |
| Mean (SD)                                      | 605351524 (231909382)               | 676145757 (248400342)               |
| Median (IQR)                                   | 565374768 (447368614, 729131927)    | 644171548 (509185784, 819167965)    |
| Range                                          | 133547231 - 1701944519              | -1319911783 - 1835022913            |
| <b>Value of Averted Mortalities, \$ (high)</b> |                                     |                                     |
| Mean (SD)                                      | 1210703048 (463818764)              | 1352291514 (496800684)              |
| Median (IQR)                                   | 1130749537 (894737227, 1458263855)  | 1288343097 (1018371568, 1638335929) |
| Range                                          | 267094462 - 3403889038              | -2639823567 - 3670045827            |
| <b>Averted mortalities, elasticity 2</b>       |                                     |                                     |
| Mean (SD)                                      | 1716 (678)                          | 2068 (793)                          |

|                                                | VAT 8% (N=1000)                  | VAT 16% (N=1000)                 |
|------------------------------------------------|----------------------------------|----------------------------------|
| Median (IQR)                                   | 1632 (1241, 2082)                | 1980 (1598, 2438)                |
| Range                                          | 73 - 5182                        | -9468 - 5484                     |
| <b>Value of Averted Mortalities, \$</b>        |                                  |                                  |
| Mean (SD)                                      | 284452225 (123621255)            | 352981644 (145743000)            |
| Median (IQR)                                   | 270460789 (197106548, 351462529) | 338529177 (268494011, 420994272) |
| Range                                          | -12010129 - 912014794            | -1840299115 - 979979635          |
| <b>Value of Averted Mortalities, \$ (low)</b>  |                                  |                                  |
| Mean (SD)                                      | 189634817 (82414170)             | 235321096 (97162000)             |
| Median (IQR)                                   | 180307193 (131404366, 234308352) | 225686118 (178996008, 280662848) |
| Range                                          | -8006753 - 608009862             | -1226866077 - 653319757          |
| <b>Value of Averted Mortalities, \$ (high)</b> |                                  |                                  |
| Mean (SD)                                      | 379269633 (164828341)            | 470642192 (194324000)            |
| Median (IQR)                                   | 360614385 (262808731, 468616705) | 451372236 (357992015, 561325697) |
| Range                                          | -16013505 - 1216019725           | -2453732153 - 1306639513         |
| <b>Averted mortalities, elasticity 3</b>       |                                  |                                  |
| Mean (SD)                                      | 2622 (413)                       | 3029 (550)                       |
| Median (IQR)                                   | 2655 (2378, 2902)                | 3061 (2772, 3301)                |
| Range                                          | 1168 - 3699                      | -9088 - 4617                     |
| <b>Value of Averted Mortalities, \$</b>        |                                  |                                  |
| Mean (SD)                                      | 449057752 (78174414)             | 527688707 (103596379)            |
| Median (IQR)                                   | 455446490 (401029263, 502971838) | 535261994 (480805752, 579847062) |
| Range                                          | 171500611 - 647351646            | -1766388504 - 819693803          |
| <b>Value of Averted Mortalities, \$ (low)</b>  |                                  |                                  |
| Mean (SD)                                      | 299371835 (52116276)             | 351792471 (69064253)             |
| Median (IQR)                                   | 303630994 (267352842, 335314559) | 356841329 (320537168, 386564708) |
| Range                                          | 114333740 - 431567764            | -1177592336 - 546462536          |
| <b>Value of Averted Mortalities, \$ (high)</b> |                                  |                                  |
| Mean (SD)                                      | 598743669 (104232552)            | 703584943 (138128505)            |
| Median (IQR)                                   | 607261987 (534705685, 670629118) | 713682658 (641074336, 773129416) |
| Range                                          | 228667481 - 863135528            | -2355184672 - 1092925071         |

## **Estimating greenhouse gas emissions differences in all three case studies**

To estimate the greenhouse gas emissions differences across scenarios we need to estimate total energy consumption from each fuel and then translate these combustion estimates to emissions. To do so, we follow common, simple assumptions about daily energy consumption, fuel-specific combustion emissions, and the fraction of biomass that is renewably harvested (fNRB) (and thus does not contribute to net emissions). Broadly we follow a reduced form of the approach outlined in Floess et al. (2023) (21).

We rely on a set of emissions factors that quantify upstream and at-point-of-combustion contributions of cooking fuels to CO<sub>2</sub>, CH<sub>4</sub>, and N<sub>2</sub>O emissions, which are then converted to CO<sub>2</sub>-equivalent (CO<sub>2</sub>e) using global warming potentials (1, 27.8, and 273, respectively). We have these emissions factors for firewood and LPG in grams CO<sub>2</sub>e emitted per megajoule (MJ) delivered from fuel combustion. For firewood, we defray a portion of related emissions by multiplying it by the fNRB. Where feasible, we apply country-specific fNRB values (India = 27%, Kenya = 61.1%). Ecuador does not have a country-specific fNRB, so we use the low- and middle-income country average of 28.8%, which is similar to nearby countries' values (Colombia 29.7%, Peru 26.1%).

### **Ecuador**

In Ecuador, we model CO<sub>2</sub>e differences due to the subsidy on the basis of the fraction of the population primarily using LPG or biomass in a given year in the observed vs. 20-y delayed scenario. To do so, we estimate the total MJ delivered for each fuel in each household, then by the population size, and by the emissions factors to obtain CO<sub>2</sub>e estimates for each year.



## Biomass

We estimate CO<sub>2</sub>e emissions for biomass in a given year using the following equation

$$CO2e_{biomass} = \gamma * EF * \omega * 7.3 \text{ MJ / person / day} * 365 \text{ days} * fNRB \quad (2)$$

where  $\gamma$  is the total population using biomass and  $\omega$  is the fraction of cooking that is done using biomass. The emissions factor (EF) is estimated from Floess et al. indicate that per megajoule energy delivered from biomass combustion the following are emitted: 3.87g CH<sub>4</sub>, 0g N<sub>2</sub>O, and 633.7g CO<sub>2</sub>. Given that these are per MJ delivered, they already take into consideration the energy efficiency of typical stoves. For LPG, this was 50%; for biomass it was 15%. Using global warming potentials (GWPs), we can estimate the equivalent emissions from CH<sub>4</sub> and N<sub>2</sub>O to CO<sub>2</sub> using standard factors of 28, 273, and 1, respectively. We estimate that per MJ delivered biomass combustion is associated with 741g CO<sub>2</sub>e. This then gets multiplied by the fNRB (28.8%), yielding estimates for Ecuador of 290g CO<sub>2</sub>e per MJ biomass delivered.

## LPG

We estimate CO<sub>2</sub>e emissions for LPG each year using the following equation:

$$CO2e_{LPG} = \gamma * EF * \omega * 7.3 \text{ MJ / person / day} * 365 \text{ days} \quad (3)$$

where  $\gamma$  is the total population using LPG and  $\omega$  is the fraction of cooking that is done using LPG. The emissions factor (EF) is estimated from Floess et al. (as with the biomass estimates) which indicate that per megajoule energy delivered from LPG combustion the following are emitted: 0.234g CH<sub>4</sub>, 0.0004g N<sub>2</sub>O, and 166g CO<sub>2</sub>. Following the above procedure, we estimate that, for Ecuador, LPG combustion is associated with 172.6 g CO<sub>2</sub>e per MJ delivered.

## India

Our modeling procedure for estimating mortality impacts from increases in LPG cylinder refill prices can be used to generate estimates of the total kilograms of LPG consumed each year. When compared against the baseline scenario, this can be interpreted as changes in LPG kg consumed due to changes in LPG prices. We use these estimates of LPG kg changes to make inferences about greenhouse gas emissions. Using the specific heat of LPG of 45 MJ/kg, we can convert kg consumed to MJ. Using the above calculations, we can then easily estimate total kg CO<sub>2</sub>e from LPG combustion averted from reduced LPG consumption:

$$CO_{2eLPG} = \gamma * 45 \text{ MJ/kg} * 0.173 \text{ kg CO}_2\text{e / MJ}$$

Where  $\gamma$  is additional kg LPG consumed per year.

While this implies reduced CO<sub>2</sub>e emissions due to LPG refill price increases, we must account for expected increases in traditional biomass combustion. Since reliable, empirical evidence of the substitution for LPG and biomass for cooking is in large part unavailable, our central approach to estimating concomitant increases in biomass combustion from reduced LPG consumption is through energy equivalences. First, we consider the efficiencies of traditional Indian chulha stoves (~15%) and LPG stoves (~51%). Dividing these two values can help us to estimate a trade-off if household demand for energy delivered were unchanged by shifting between biomass and gas (0.29). Thus, we multiply MJ of averted kg LPG by 0.29 to obtain an estimate of increased biomass combustion in MJ. For each additional MJ firewood combustion, we estimate 278.5 g CO<sub>2</sub>e/MJ firewood delivered.

## Kenya

Our approach for modeling in Kenya is identical to the approach outlined for India, except that the fNRB in Kenya is substantially higher, which results in much higher GHG emissions from firewood cooking (529.9 g CO<sub>2</sub>e/MJ delivered).

### Monetizing CO<sub>2</sub> emissions

We rely on Burke et al. (2023)(22) to monetize changes in CO<sub>2</sub> emissions in all three case studies. Burke et al. (2023) link recent efforts to quantify the harms of CO<sub>2</sub> emissions through 2100 (i.e., the social cost of carbon; SCC), and generate year-specific SCCs from 1980 to 2022 (Figure S10). These year-specific SCCs are a large advancement over previous efforts to quantify SCCs and are a central motivating factor for using these estimates. We use their 2% discount rate scenarios. In general, the SCC ranges from \$379 / tCO<sub>2</sub> in 1980 to \$203 / tCO<sub>2</sub> in 2020. For future damages, we discount the SCC by the social discount factor for each country as mentioned in the mortality modeling section.

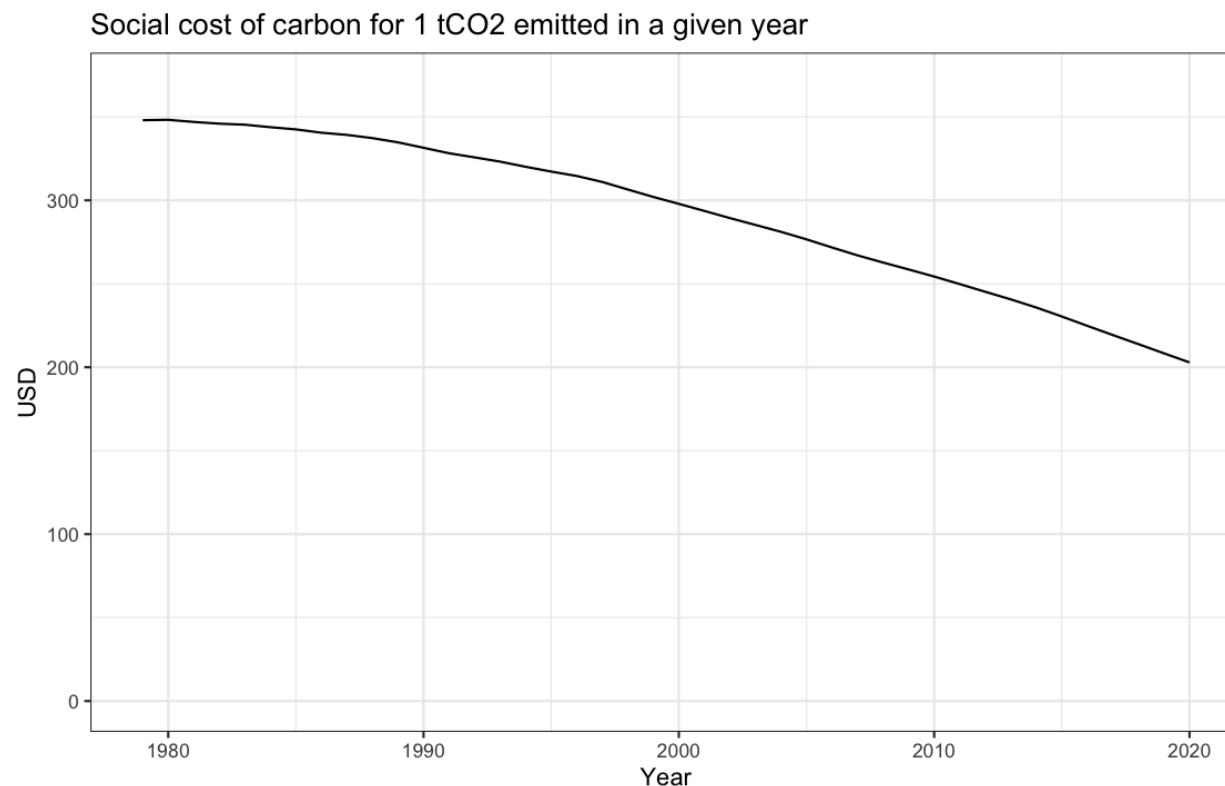

**Figure S10. Social cost of carbon (SCC) for 1tCO<sub>2</sub> emitted each year from 1980-2020.** We use these SCCs to monetize the carbon-related benefits of Ecuador's historical LPG subsidy. We then use the 2020 values (discounted into the future using country-specific rates) to quantify benefits from future changes in CO<sub>2</sub> emissions. Derived from Burke et al. (2023).

## References

1. World Health Organization, Household Energy Database. *Maps & Data*, (available at <http://www.who.int/airpollution/data/household-energy-database/en/>).
2. C. F. Gould *et al.*, *Journal of Exposure Science & Environmental Epidemiology*. **30**, 707–720 (2020).
3. R. Burnett *et al.*, *Proc. Natl. Acad. Sci. U.S.A.* **115**, 9592–9597 (2018).
4. R. C. Nethery, F. Dominici, *European Heart Journal*. **40**, 1597–1599 (2019).
5. A. Pozzer *et al.*, *GeoHealth*, in press, doi:10.1029/2022GH000711.
6. Sander, Klas, Mira-Salama, Daniel, Feuerbacher, Arndt, The cost of air pollution - a case study for the city of Cuenca, Ecuador. *World Bank*, (available at <https://documents.worldbank.org/en/publication/documents-reports/documentdetail/458511468189273908/The-cost-of-air-pollution-a-case-study-for-the-city-of-Cuenca-Ecuador>).
7. Repositorio Digital: Estimación del valor estadístico de la vida para Ecuador en el año 2019, (available at <http://www.dspace.uce.edu.ec/handle/25000/24631?mode=full>).
8. W. K. Viscusi, *J Risk Uncertain.* **61**, 101–128 (2020).
9. C. F. Gould *et al.*, *Environ Health Perspect.* **131**, 037017 (2023).
10. M. Jeuland *et al.*, *World Development Perspectives*. **30**, 100490 (2023).
11. S. Agrawal, S. Mani, A. Jain, K. Ganesan, “State of Electricity Access in India: Insights from the India Residential Energy consumption Survey (IRES) 2020” (Council on Energy, Environment and Water, New Delhi, India, 2020), (available at <https://www.ceew.in/publications/state-electricity-access-india>).
12. T. F. Clasen *et al.*, *New England Journal of Medicine*. **387**, 1735–1746 (2022).
13. M. Johnson *et al.*, *Environ Health Perspect.* **130**, 097005 (2022).
14. M. Haacker, T. B. Hallett, R. Atun, *Health Policy and Planning*, czz127 (2019).
15. M. Shupler *et al.*, *Nat Energy*. **6**, 1198–1210 (2021).
16. M. Shupler *et al.*, “Declining use of clean cooking fuels & food security in 2022: Downstream impact of the Russian-Ukrainian war in a Kenyan informal urban settlement” (preprint, *Epidemiology*, 2023), , doi:10.1101/2023.07.09.23292423.
17. M. Shupler *et al.*, *Applied Energy*. **292**, 116769 (2021).
18. M. Shupler *et al.*, *The Lancet Planetary Health*. **4**, e451–e462 (2020).

19. M. Johnson *et al.*, *Indoor Air*, in press, doi:10.1111/ina.12790.
20. W. K. Viscusi, C. J. Masterman, *Journal of Benefit-Cost Analysis*. **8**, 226–250 (2017).
21. E. Floess *et al.*, *Environ. Res. Lett.* **18**, 034010 (2023).
22. M. Burke, M. Zahid, N. Diffenbaugh, S. Hsiang, “Quantifying Climate Change Loss and Damage Consistent with a Social Cost of Greenhouse Gases” (w31658, National Bureau of Economic Research, Cambridge, MA, 2023), p. w31658.
